# Supplementary material for: The Role of Long Noncoding RNAs on Male Infertility: A Systematic Review and In Silico Analysis
Source: MDPI journal article supplement (doi:10.3390/biology11101510), 2022-10-15
Supplement: s1 [file s1]

**Supplementary Table S6.** lncRNAs with a potential role in oligozoospermia according to publications studying the expression profiles of lncRNAs

| <b>LncRNAs</b>       | <b>Reference</b>                | <b>Methodology</b>   | <b>Samples</b>                       | <b>Tissue</b> | <b>Change of expression</b> |
|----------------------|---------------------------------|----------------------|--------------------------------------|---------------|-----------------------------|
| <i>lnc-GNS-3</i>     | Sun <i>et al.</i> , (2021) [37] | RNA sequencing, qPCR | 6 oligozoospermic, 6 normozoospermic | Semen         | Upregulated in patients     |
| <i>XLOC_515910</i>   | Sun <i>et al.</i> , (2021) [37] | RNA sequencing, qPCR | 6 oligozoospermic, 6 normozoospermic | Semen         | Upregulated in patients     |
| <i>lnc-SERHL2-7</i>  | Sun <i>et al.</i> , (2021) [37] | RNA sequencing, qPCR | 6 oligozoospermic, 6 normozoospermic | Semen         | Upregulated in patients     |
| <i>lnc-IL31RA-1</i>  | Sun <i>et al.</i> , (2021) [37] | RNA sequencing, qPCR | 6 oligozoospermic, 6 normozoospermic | Semen         | Upregulated in patients     |
| <i>lnc-NLRP2-2</i>   | Sun <i>et al.</i> , (2021) [37] | RNA sequencing, qPCR | 6 oligozoospermic, 6 normozoospermic | Semen         | Upregulated in patients     |
| <i>lnc-CDK12-2</i>   | Sun <i>et al.</i> , (2021) [37] | RNA sequencing, qPCR | 6 oligozoospermic, 6 normozoospermic | Semen         | Upregulated in patients     |
| <i>XLOC_1093926</i>  | Sun <i>et al.</i> , (2021) [37] | RNA sequencing, qPCR | 6 oligozoospermic, 6 normozoospermic | Semen         | Upregulated in patients     |
| <i>lnc-LRRC38-2</i>  | Sun <i>et al.</i> , (2021) [37] | RNA sequencing, qPCR | 6 oligozoospermic, 6 normozoospermic | Semen         | Upregulated in patients     |
| <i>lnc-FOXN1-1</i>   | Sun <i>et al.</i> , (2021) [37] | RNA sequencing, qPCR | 6 oligozoospermic, 6 normozoospermic | Semen         | Upregulated in patients     |
| <i>lnc-SLC46A2-1</i> | Sun <i>et al.</i> , (2021) [37] | RNA sequencing, qPCR | 6 oligozoospermic, 6 normozoospermic | Semen         | Upregulated in patients     |
| <i>lnc-CSNK1A1-7</i> | Sun <i>et al.</i> , (2021) [37] | RNA sequencing, qPCR | 6 oligozoospermic, 6 normozoospermic | Semen         | Upregulated in patients     |
| <i>lnc-PHLDB1-1</i>  | Sun <i>et al.</i> , (2021) [37] | RNA sequencing, qPCR | 6 oligozoospermic, 6 normozoospermic | Semen         | Upregulated in patients     |

|                            |                                 |                      |                                      |       |                           |
|----------------------------|---------------------------------|----------------------|--------------------------------------|-------|---------------------------|
| <i>lnc-KB-1980E6.3.1-6</i> | Sun <i>et al.</i> , (2021) [37] | RNA sequencing, qPCR | 6 oligozoospermic, 6 normozoospermic | Semen | Upregulated in patients   |
| <i>lnc-LAT2-2</i>          | Sun <i>et al.</i> , (2021) [37] | RNA sequencing, qPCR | 6 oligozoospermic, 6 normozoospermic | Semen | Upregulated in patients   |
| <i>XLOC_2394941</i>        | Sun <i>et al.</i> , (2021) [37] | RNA sequencing, qPCR | 6 oligozoospermic, 6 normozoospermic | Semen | Upregulated in patients   |
| <i>lnc-EEF1B2-3</i>        | Sun <i>et al.</i> , (2021) [37] | RNA sequencing, qPCR | 6 oligozoospermic, 6 normozoospermic | Semen | Upregulated in patients   |
| <i>lnc-AP3S1-15</i>        | Sun <i>et al.</i> , (2021) [37] | RNA sequencing, qPCR | 6 oligozoospermic, 6 normozoospermic | Semen | Upregulated in patients   |
| <i>lnc-SLA2-1</i>          | Sun <i>et al.</i> , (2021) [37] | RNA sequencing, qPCR | 6 oligozoospermic, 6 normozoospermic | Semen | Upregulated in patients   |
| <i>lnc-RAPH1-6</i>         | Sun <i>et al.</i> , (2021) [37] | RNA sequencing, qPCR | 6 oligozoospermic, 6 normozoospermic | Semen | Upregulated in patients   |
| <i>lnc-TICAM1-1</i>        | Sun <i>et al.</i> , (2021) [37] | RNA sequencing, qPCR | 6 oligozoospermic, 6 normozoospermic | Semen | Upregulated in patients   |
| <i>ITGA9-AS1</i>           | Sun <i>et al.</i> , (2021) [37] | RNA sequencing, qPCR | 6 oligozoospermic, 6 normozoospermic | Semen | Downregulated in patients |
