# Supplementary material for: The Role of Long Noncoding RNAs on Male Infertility: A Systematic Review and In Silico Analysis
Source: MDPI journal article supplement (doi:10.3390/biology11101510), 2022-10-15
Supplement: s1 [file s1]

**Supplementary Table S8:** LncRNAs with a potential role in male infertility according to papers investigating genetic variants and study characteristics

| <b>LncRNAs</b>               | <b>Reference</b>                       | <b>Methodology</b>                               | <b>Samples</b>                                                                                                                | <b>Tissue</b>                 |
|------------------------------|----------------------------------------|--------------------------------------------------|-------------------------------------------------------------------------------------------------------------------------------|-------------------------------|
| <i>LOC100507205</i>          | Eggers <i>et al.</i> , (2015) [32]     | Microarray technology, MLPA Analysis             | 19 men with histologically confirmed meiotic arrest, healthy individuals (information from database)                          | Peripheral leucocytes (Blood) |
| <i>LINC02231</i>             | Kyrgiagini <i>et al.</i> , (2020) [42] | SNP screening array (genotyping), Bioinformatics | 83 non-normozoospermic (oligozoospermic, asthenozoospermic, teratozoospermic or combinations), 76 normozoospermic individuals | Semen                         |
| <i>LINC00347</i>             | Kyrgiagini <i>et al.</i> , (2020) [42] | SNP screening array (genotyping), Bioinformatics | 83 non-normozoospermic (oligozoospermic, asthenozoospermic, teratozoospermic or combinations), 76 normozoospermic individuals | Semen                         |
| <i>LINC02134</i>             | Kyrgiagini <i>et al.</i> , (2020) [42] | SNP screening array (genotyping), Bioinformatics | 83 non-normozoospermic (oligozoospermic, asthenozoospermic, teratozoospermic or combinations), 76 normozoospermic individuals | Semen                         |
| <i>NCRNA00157/C HODL-AS1</i> | Kyrgiagini <i>et al.</i> , (2020) [42] | SNP screening array (genotyping), Bioinformatics | 83 non-normozoospermic (oligozoospermic, asthenozoospermic, teratozoospermic or combinations), 76 normozoospermic individuals | Semen                         |
| <i>LINC02493</i>             | Kyrgiagini <i>et al.</i> , (2020) [42] | SNP screening array (genotyping), Bioinformatics | 83 non-normozoospermic (oligozoospermic, asthenozoospermic, teratozoospermic or combinations), 76 normozoospermic individuals | Semen                         |

|                    |                                           |                                                                                |                                                                                                                                                                                                                         |                  |
|--------------------|-------------------------------------------|--------------------------------------------------------------------------------|-------------------------------------------------------------------------------------------------------------------------------------------------------------------------------------------------------------------------|------------------|
| <i>Lnc-CASK-1</i>  | Kyrgiafini <i>et al.</i> , (2020) [42]    | SNP screening array (genotyping), Bioinformatics                               | 83 non-normozoospermic (oligozoospermic, asthenozoospermic, teratozoospermic or combinations), 76 normozoospermic individuals                                                                                           | Semen            |
| <i>LINC01641</i>   | Cerván-Martín <i>et al.</i> , (2021) [44] | Genotyping (TaqMan allelic discrimination technology), Bioinformatics analysis | 674 infertile men with azoospermia or severe oligospermia (480 NOA and 194 SO men), 700 men representative of the general population (with self-reported fatherhood) and 358 men with proven normal sperm concentration | Peripheral blood |
| <i>RP11-38C6.2</i> | Cerván-Martín <i>et al.</i> , (2021) [44] | Genotyping (TaqMan allelic discrimination technology), Bioinformatics analysis | 674 infertile men with azoospermia or severe oligospermia (480 NOA and 194 SO men), 700 men representative of the general population (with self-reported fatherhood) and 358 men with proven normal sperm concentration | Peripheral blood |
