# Supplementary material for: The Role of Long Noncoding RNAs on Male Infertility: A Systematic Review and In Silico Analysis
Source: MDPI journal article supplement (doi:10.3390/biology11101510), 2022-10-15
Supplement: s1 [file s1]

**Supplementary Table S5.** lncRNAs with a potential role in teratozoospermia according to publications studying the expression profiles of lncRNAs and study characteristics

| <b>LncRNAs</b>      | <b>Reference</b>           | <b>Methodology</b>    | <b>Samples</b>                         | <b>Tissue</b> | <b>Change of expression</b> |
|---------------------|----------------------------|-----------------------|----------------------------------------|---------------|-----------------------------|
| <i>LINC00266-1</i>  | Zhou and Wang, (2020) [45] | Gene expression array | 8 teratozoospermic, 13 normozoospermic | Semen         | Upregulated in patients     |
| <i>LINC00467</i>    | Zhou and Wang, (2020) [45] | Gene expression array | 8 teratozoospermic, 13 normozoospermic | Semen         | Downregulated in patients   |
| <i>ADARB2-AS1</i>   | Zhou and Wang, (2020) [45] | Gene expression array | 8 teratozoospermic, 13 normozoospermic | Semen         | Upregulated in patients     |
| <i>AP000525</i>     | Zhou and Wang, (2020) [45] | Gene expression array | 8 teratozoospermic, 13 normozoospermic | Semen         | Upregulated in patients     |
| <i>AC008088</i>     | Zhou and Wang, (2020) [45] | Gene expression array | 8 teratozoospermic, 13 normozoospermic | Semen         | Downregulated in patients   |
| <i>COX10-AS1</i>    | Zhou and Wang, (2020) [45] | Gene expression array | 8 teratozoospermic, 13 normozoospermic | Semen         | Upregulated in patients     |
| <i>HLA-F-AS1</i>    | Zhou and Wang, (2020) [45] | Gene expression array | 8 teratozoospermic, 13 normozoospermic | Semen         | Downregulated in patients   |
| <i>LINC00466</i>    | Zhou and Wang, (2020) [45] | Gene expression array | 8 teratozoospermic, 13 normozoospermic | Semen         | Upregulated in patients     |
| <i>EPB41L4A-AS1</i> | Zhou and Wang, (2020) [45] | Gene expression array | 8 teratozoospermic, 13 normozoospermic | Semen         | Downregulated in patients   |
| <i>LINC00347</i>    | Zhou and Wang, (2020) [45] | Gene expression array | 8 teratozoospermic, 13 normozoospermic | Semen         | Downregulated in patients   |
| <i>LINC00276</i>    | Zhou and Wang, (2020) [45] | Gene expression array | 8 teratozoospermic, 13 normozoospermic | Semen         | Upregulated in patients     |
| <i>AL022344</i>     | Zhou and Wang, (2020) [45] | Gene expression array | 8 teratozoospermic, 13 normozoospermic | Semen         | Upregulated in patients     |
| <i>C12orf77</i>     | Zhou and Wang,             | Gene expression array | 8 teratozoospermic,                    | Semen         | Upregulated in patients     |

|                     |                                  |                       |                                                 |       |                           |
|---------------------|----------------------------------|-----------------------|-------------------------------------------------|-------|---------------------------|
|                     | (2020)<br>[45]                   |                       | 13<br>normozoospermic                           |       |                           |
| <i>ST7-AS2</i>      | Zhou and Wang,<br>(2020)<br>[45] | Gene expression array | 8<br>teratozoospermic,<br>13<br>normozoospermic | Semen | Downregulated in patients |
| <i>PRICKLE2-AS3</i> | Zhou and Wang,<br>(2020)<br>[45] | Gene expression array | 8<br>teratozoospermic,<br>13<br>normozoospermic | Semen | Upregulated in patients   |
| <i>ZBTB20-AS1</i>   | Zhou and Wang,<br>(2020)<br>[45] | Gene expression array | 8<br>teratozoospermic,<br>13<br>normozoospermic | Semen | Downregulated in patients |
| <i>IGSF11-AS1</i>   | Zhou and Wang,<br>(2020)<br>[45] | Gene expression array | 8<br>teratozoospermic,<br>13<br>normozoospermic | Semen | Downregulated in patients |
| <i>AC092620</i>     | Zhou and Wang,<br>(2020)<br>[45] | Gene expression array | 8<br>teratozoospermic,<br>13<br>normozoospermic | Semen | Upregulated in patients   |
| <i>PARD6G-AS1</i>   | Zhou and Wang,<br>(2020)<br>[45] | Gene expression array | 8<br>teratozoospermic,<br>13<br>normozoospermic | Semen | Downregulated in patients |
| <i>MALAT1</i>       | Zhou and Wang,<br>(2020)<br>[45] | Gene expression array | 8<br>teratozoospermic,<br>13<br>normozoospermic | Semen | Downregulated in patients |
| <i>SLIT2-IT1</i>    | Zhou and Wang,<br>(2020)<br>[45] | Gene expression array | 8<br>teratozoospermic,<br>13<br>normozoospermic | Semen | Downregulated in patients |
| <i>FAM13A-AS1</i>   | Zhou and Wang,<br>(2020)<br>[45] | Gene expression array | 8<br>teratozoospermic,<br>13<br>normozoospermic | Semen | Upregulated in patients   |
| <i>ARHGEF26-AS1</i> | Zhou and Wang,<br>(2020)<br>[45] | Gene expression array | 8<br>teratozoospermic,<br>13<br>normozoospermic | Semen | Upregulated in patients   |
| <i>FAM181A-AS1</i>  | Zhou and Wang,<br>(2020)<br>[45] | Gene expression array | 8<br>teratozoospermic,<br>13<br>normozoospermic | Semen | Downregulated in patients |
| <i>LZTS1-AS1</i>    | Zhou and Wang,<br>(2020)<br>[45] | Gene expression array | 8<br>teratozoospermic,<br>13<br>normozoospermic | Semen | Upregulated in patients   |
