# Supplementary material for: The Role of Long Noncoding RNAs on Male Infertility: A Systematic Review and In Silico Analysis
Source: MDPI journal article supplement (doi:10.3390/biology11101510), 2022-10-15
Supplement: s1 [file s1]

**Supplementary Table S2.** lncRNAs with a potential role in azoospermia according to publications studying the expression profiles of lncRNAs and study characteristics

| LncRNAs                               | Reference                                     | Methodology                   | Samples                                                                                                                | Tissue                                        | Change of expression                     |
|---------------------------------------|-----------------------------------------------|-------------------------------|------------------------------------------------------------------------------------------------------------------------|-----------------------------------------------|------------------------------------------|
| <i>NLC1-C</i><br>( <i>LINC00162</i> ) | Lü <i>et al.</i> ,<br>(2015)<br>[26]          | Microarray<br>and qPCR        | 3 patients with<br>MA, 2 with<br>Hypo, 3 controls                                                                      | Testis                                        | Downregulated in NOA patients (MA, Hypo) |
| <i>HOTTIP</i>                         | Lü <i>et al.</i> ,<br>(2015)<br>[26]          | Microarray<br>and qPCR        | 3 patients with<br>MA, 2 with<br>Hypo, 3 controls                                                                      | Testis                                        | Downregulated in NOA patients (MA, Hypo) |
|                                       | Su <i>et al.</i> ,<br>(2019)<br>[39]          | qPCR                          | 16 patients with<br>Hypo, 16 control<br>subjects                                                                       | Testis                                        | Downregulated in Hypo patients           |
| <i>FAM230B</i>                        | Sabetian<br><i>et al.</i> ,<br>(2022)<br>[33] | Microarray<br>technology      | 27 NOA, 4<br>healthy<br>individuals                                                                                    | Testis                                        | Downregulated in patients                |
| <i>FER1L6-AS2</i>                     | Sabetian<br><i>et al.</i> ,<br>(2022)<br>[33] | Microarray<br>technology      | 27 NOA, 4<br>healthy<br>individuals                                                                                    | Testis                                        | Downregulated in patients                |
| <i>FAM27C</i>                         | Sabetian<br><i>et al.</i> ,<br>(2022)<br>[33] | Microarray<br>technology      | 27 NOA, 4<br>healthy<br>individuals                                                                                    | Testis                                        | Downregulated in patients                |
| <i>LINC00238</i>                      | Sabetian<br><i>et al.</i> ,<br>(2022)<br>[33] | Microarray<br>technology      | 27 NOA, 4<br>healthy<br>individuals                                                                                    | Testis                                        | Downregulated in patients                |
| <i>LINC00301</i>                      | Sabetian<br><i>et al.</i> ,<br>(2022)<br>[33] | Microarray<br>technology      | 27 NOA, 4<br>healthy<br>individuals                                                                                    | Testis                                        | Downregulated in patients                |
|                                       | Xie <i>et al.</i> ,<br>(2020)<br>[27]         | RNA<br>sequencing<br>and qPCR | RNA seq: 6<br>normozoospermic, 5 NOA<br>patients (Sertoli<br>cell-only<br>syndrome);<br>Validation: 96<br>NOA patients | Seminal<br>plasma<br>(extracellular vesicles) | Downregulated in patients                |
| <i>LINC00643</i>                      | Sabetian<br><i>et al.</i> ,<br>(2022)<br>[33] | Microarray<br>technology      | 27 NOA, 4<br>healthy<br>individuals                                                                                    | Testis                                        | Downregulated in patients                |
| <i>LINC00654</i>                      | Sabetian<br><i>et al.</i> ,<br>(2022)<br>[33] | Microarray<br>technology      | 27 NOA, 4<br>healthy<br>individuals                                                                                    | Testis                                        | Downregulated in patients                |
| <i>LINC00661</i>                      | Sabetian<br><i>et al.</i> ,                   | Microarray<br>technology      | 27 NOA, 4<br>healthy<br>individuals                                                                                    | Testis                                        | Downregulated in patients                |

|                     |                                               |                                    |                                                                                                                            |                                                   |                               |
|---------------------|-----------------------------------------------|------------------------------------|----------------------------------------------------------------------------------------------------------------------------|---------------------------------------------------|-------------------------------|
|                     | (2022)<br>[33]                                |                                    |                                                                                                                            |                                                   |                               |
| <i>LINC00905</i>    | Sabetian<br><i>et al.</i> ,<br>(2022)<br>[33] | Microarray<br>technology           | 27 NOA, 4<br>healthy<br>individuals                                                                                        | Testis                                            | Downregulat<br>ed in patients |
| <i>MORC2-AS1</i>    | Sabetian<br><i>et al.</i> ,<br>(2022)<br>[33] | Microarray<br>technology           | 27 NOA, 4<br>healthy<br>individuals                                                                                        | Testis                                            | Downregulat<br>ed in patients |
| <i>LOC100505685</i> | Xie <i>et al.</i> ,<br>(2020)<br>[27]         | RNA<br>sequencing<br>and qPCR      | RNA seq: 6<br>normozoosperm<br>ic, 5 NOA<br>patients (Sertoli<br>cell-only<br>syndrome);<br>Validation: 96<br>NOA patients | Seminal<br>plasma<br>(Extracellul<br>ar vesicles) | Upregulated<br>in patients    |
| <i>SPATA42</i>      | Xie <i>et al.</i> ,<br>(2020)<br>[27]         | RNA<br>sequencing<br>and qPCR      | RNA seq: 6<br>normozoosperm<br>ic, 5 NOA<br>patients (Sertoli<br>cell-only<br>syndrome);<br>Validation: 96<br>NOA patients | Seminal<br>plasma<br>(Extracellul<br>ar vesicles) | Downregulat<br>ed in patients |
|                     | Bo <i>et al.</i> ,<br>(2020)<br>[29]          | Microarray<br>datasets<br>and qPCR | 3 sets: 30 NOA,<br>8 Normal<br>(training); 31<br>NOA, 8 Normal<br>(validation); 27<br>NOA, 4 Normal<br>(validation)        | Testis                                            | Downregulat<br>ed in patients |
| <i>CCDC37-DT</i>    | Xie <i>et al.</i> ,<br>(2020)<br>[27]         | RNA<br>sequencing<br>and qPCR      | RNA seq: 6<br>normozoosperm<br>ic, 5 NOA<br>patients (Sertoli<br>cell-only<br>syndrome);<br>Validation: 96<br>NOA patients | Seminal<br>plasma<br>(Extracellul<br>ar vesicles) | Downregulat<br>ed in patients |
| <i>GABRG3-AS1</i>   | Xie <i>et al.</i> ,<br>(2020)<br>[27]         | RNA<br>sequencing<br>and qPCR      | RNA seq: 6<br>normozoosperm<br>ic, 5 NOA<br>patients (Sertoli<br>cell-only<br>syndrome);<br>Validation: 96<br>NOA patients | Seminal<br>plasma<br>(Extracellul<br>ar vesicles) | Downregulat<br>ed in patients |
| <i>LOC440934</i>    | Xie <i>et al.</i> ,<br>(2020)<br>[27]         | RNA<br>sequencing<br>and qPCR      | RNA seq: 6<br>normozoosperm<br>ic, 5 NOA<br>patients (Sertoli<br>cell-only<br>syndrome);                                   | Seminal<br>plasma<br>(Extracellul<br>ar vesicles) | Downregulat<br>ed in patients |

|                                                  |                                       |                              |                                                                                                      |                                         |                           |
|--------------------------------------------------|---------------------------------------|------------------------------|------------------------------------------------------------------------------------------------------|-----------------------------------------|---------------------------|
|                                                  |                                       |                              | Validation: 96 NOA patients                                                                          |                                         |                           |
| <i>LOC101929088</i><br>( <i>XR_927561.2</i> )    | Xie <i>et al.</i> ,<br>(2020)<br>[27] | RNA sequencing and qPCR      | RNA seq: 6 normozoospermic, 5 NOA patients (Sertoli cell-only syndrome); Validation: 96 NOA patients | Seminal plasma (Extracellular vesicles) | Upregulated in patients   |
| <i>LOC101929088</i><br>( <i>XR_001745218.1</i> ) | Xie <i>et al.</i> ,<br>(2020)<br>[27] | RNA sequencing and qPCR      | RNA seq: 6 normozoospermic, 5 NOA patients (Sertoli cell-only syndrome); Validation: 96 NOA patients | Seminal plasma (Extracellular vesicles) | Upregulated in patients   |
| <i>LINC00343</i>                                 | Xie <i>et al.</i> ,<br>(2020)<br>[27] | RNA sequencing and qPCR      | RNA seq: 6 normozoospermic, 5 NOA patients (Sertoli cell-only syndrome); Validation: 96 NOA patients | Seminal plasma (Extracellular vesicles) | Downregulated in patients |
| <i>LINC00467</i>                                 | Bo <i>et al.</i> ,<br>(2020)<br>[29]  | Microarray datasets and qPCR | 3 sets: 30 NOA, 8 Normal (training); 31 NOA, 8 Normal (validation); 27 NOA, 4 Normal (validation)    | Testis                                  | Downregulated in patients |
| <i>LINC00884</i>                                 | Bo <i>et al.</i> ,<br>(2020)<br>[29]  | Microarray datasets and qPCR | 3 sets: 30 NOA, 8 Normal (training); 31 NOA, 8 Normal (validation); 27 NOA, 4 Normal (validation)    | Testis                                  | Upregulated in patients   |
| <i>LEMD1-AS1</i>                                 | Bo <i>et al.</i> ,<br>(2020)<br>[29]  | Microarray datasets and qPCR | 3 sets: 30 NOA, 8 Normal (training); 31 NOA, 8 Normal (validation); 27 NOA, 4 Normal (validation)    | Testis                                  | Upregulated in patients   |
| <i>ZFAS1</i>                                     | Bo <i>et al.</i> ,<br>(2020)<br>[29]  | Microarray datasets and qPCR | 3 sets: 30 NOA, 8 Normal (training); 31 NOA, 8 Normal (validation); 27 NOA, 4 Normal (validation)    | Testis                                  | Upregulated in patients   |

|                    |                                      |                                    |                                                                                                                                                               |        |                               |
|--------------------|--------------------------------------|------------------------------------|---------------------------------------------------------------------------------------------------------------------------------------------------------------|--------|-------------------------------|
| <i>CSNK1G2-AS1</i> | Bo <i>et al.</i> ,<br>(2020)<br>[29] | Microarray<br>datasets<br>and qPCR | 3 sets: 30 NOA,<br>8 Normal<br>(training); 31<br>NOA, 8 Normal<br>(validation); 27<br>NOA, 4 Normal<br>(validation)                                           | Testis | Downregulat<br>ed in patients |
| <i>ZNF295-AS1</i>  | Bo <i>et al.</i> ,<br>(2020)<br>[29] | Microarray<br>datasets<br>and qPCR | 3 sets: Sertoli<br>cell-only, 8<br>normal<br>(training); Sertoli<br>cell-only, 8<br>Normal<br>(validation),<br>Sertoli cell-only,<br>4 Normal<br>(validation) | Testis | Downregulat<br>ed in patients |
| <i>DSCR8</i>       | Bo <i>et al.</i> ,<br>(2020)<br>[29] | Microarray<br>datasets<br>and qPCR | 3 sets: Sertoli<br>cell-only, 8<br>normal<br>(training); Sertoli<br>cell-only, 8<br>Normal<br>(validation),<br>Sertoli cell-only,<br>4 Normal<br>(validation) | Testis | Downregulat<br>ed in patients |
| <i>LINC00173</i>   | Bo <i>et al.</i> ,<br>(2020)<br>[29] | Microarray<br>datasets<br>and qPCR | 3 sets: Sertoli<br>cell-only, 8<br>normal<br>(training); Sertoli<br>cell-only, 8<br>Normal<br>(validation),<br>Sertoli cell-only,<br>4 Normal<br>(validation) | Testis | Upregulated<br>in patients    |
| <i>RUSC1-AS1</i>   | Bo <i>et al.</i> ,<br>(2020)<br>[29] | Microarray<br>datasets<br>and qPCR | 3 sets: Sertoli<br>cell-only, 8<br>normal<br>(training); Sertoli<br>cell-only, 8<br>Normal<br>(validation),<br>Sertoli cell-only,<br>4 Normal<br>(validation) | Testis | Upregulated<br>in patients    |
