# Supplementary material for: The Role of Long Noncoding RNAs on Male Infertility: A Systematic Review and In Silico Analysis
Source: MDPI journal article supplement (doi:10.3390/biology11101510), 2022-10-15
Supplement: s1 [file s1]

**Supplementary Table S4.** lncRNAs with a potential role in asthenozoospermia according to publications studying the expression profiles of lncRNAs and study characteristics

| LncRNAs                     | Reference                            | Methodology             | Samples                                                           | Tissue                    | Change of expression      |
|-----------------------------|--------------------------------------|-------------------------|-------------------------------------------------------------------|---------------------------|---------------------------|
| <i>HOTAIR</i>               | Zhang <i>et al.</i> , (2015) [35]    | qPCR                    | 45 asthenozoospermic patients, 45 healthy controls                | Semen                     | Downregulated in patients |
| <i>LNC32058</i>             | Zhang <i>et al.</i> , (2019) [31]    | RNA sequencing and qPCR | 36 asthenozoospermic males, 48 healthy males                      | Semen                     | Upregulated in patients   |
| <i>LNC09522</i>             | Zhang <i>et al.</i> , (2019) [31]    | RNA sequencing and qPCR | 36 asthenozoospermic males, 48 healthy males                      | Semen                     | Upregulated in patients   |
| <i>LNC98487</i>             | Zhang <i>et al.</i> , (2019) [31]    | RNA sequencing and qPCR | 36 asthenozoospermic males, 48 healthy males                      | Semen                     | Upregulated in patients   |
| <i>ANO1-AS2 (LINC02584)</i> | Saberian <i>et al.</i> , (2020) [43] | qPCR                    | 32 patients with AZ, 34 people with normozoospermia (NZ, control) | Semen                     | Upregulated in patients   |
| <i>IGF2-AS</i>              | Lu <i>et al.</i> , (2020) [41]       | RNA sequencing and qPCR | 25 men with asthenozoospermia, 25 male healthy individuals        | Seminal plasma (exosomes) | Downregulated in patients |
| <i>LINC00893</i>            | Lu <i>et al.</i> , (2020) [41]       | RNA sequencing and qPCR | 25 men with asthenozoospermia, 25 male healthy individuals        | Seminal plasma (exosomes) | Downregulated in patients |
| <i>LINC00667</i>            | Lu <i>et al.</i> , (2020) [41]       | RNA sequencing and qPCR | 25 men with asthenozoospermia, 25 male healthy individuals        | Seminal plasma (exosomes) | Upregulated in patients   |
| <i>MIR497HG</i>             | Lu <i>et al.</i> , (2020) [41]       | RNA sequencing and qPCR | 25 men with asthenozoospermia, 25 male healthy individuals        | Seminal plasma (exosomes) | Downregulated in patients |
| <i>COX10-AS1</i>            | Lu <i>et al.</i> , (2020) [41]       | RNA sequencing and qPCR | 25 men with asthenozoospermia, 25 male healthy individuals        | Seminal plasma (exosomes) | Upregulated in patients   |
| <i>AC010247.2</i>           | Lu <i>et al.</i> , (2020) [41]       | RNA sequencing and qPCR | 25 men with asthenozoospermia, 25 male                            | Seminal plasma            | Downregulated in patients |

|            |                                |                         |                                                            |                           |                           |
|------------|--------------------------------|-------------------------|------------------------------------------------------------|---------------------------|---------------------------|
|            |                                |                         | healthy individuals                                        | (exosomes)                |                           |
| AC009965.1 | Lu <i>et al.</i> , (2020) [41] | RNA sequencing and qPCR | 25 men with asthenozoospermia, 25 male healthy individuals | Seminal plasma (exosomes) | Upregulated in patients   |
| PCED1B-AS1 | Lu <i>et al.</i> , (2020) [41] | RNA sequencing and qPCR | 25 men with asthenozoospermia, 25 male healthy individuals | Seminal plasma (exosomes) | Upregulated in patients   |
| AL358234.1 | Lu <i>et al.</i> , (2020) [41] | RNA sequencing and qPCR | 25 men with asthenozoospermia, 25 male healthy individuals | Seminal plasma (exosomes) | Upregulated in patients   |
| AC121764.1 | Lu <i>et al.</i> , (2020) [41] | RNA sequencing and qPCR | 25 men with asthenozoospermia, 25 male healthy individuals | Seminal plasma (exosomes) | Upregulated in patients   |
| AC019117.2 | Lu <i>et al.</i> , (2020) [41] | RNA sequencing and qPCR | 25 men with asthenozoospermia, 25 male healthy individuals | Seminal plasma (exosomes) | Upregulated in patients   |
| AC112176.1 | Lu <i>et al.</i> , (2020) [41] | RNA sequencing and qPCR | 25 men with asthenozoospermia, 25 male healthy individuals | Seminal plasma (exosomes) | Upregulated in patients   |
| AC022398.1 | Lu <i>et al.</i> , (2020) [41] | RNA sequencing and qPCR | 25 men with asthenozoospermia, 25 male healthy individuals | Seminal plasma (exosomes) | Upregulated in patients   |
| LSAMP-AS1  | Lu <i>et al.</i> , (2020) [41] | RNA sequencing and qPCR | 25 men with asthenozoospermia, 25 male healthy individuals | Seminal plasma (exosomes) | Upregulated in patients   |
| AC025300.1 | Lu <i>et al.</i> , (2020) [41] | RNA sequencing and qPCR | 25 men with asthenozoospermia, 25 male healthy individuals | Seminal plasma (exosomes) | Upregulated in patients   |
| LINC02042  | Lu <i>et al.</i> , (2020) [41] | RNA sequencing and qPCR | 25 men with asthenozoospermia, 25 male healthy individuals | Seminal plasma (exosomes) | Upregulated in patients   |
| AC011444.3 | Lu <i>et al.</i> , (2020) [41] | RNA sequencing and qPCR | 25 men with asthenozoospermia, 25 male healthy individuals | Seminal plasma (exosomes) | Downregulated in patients |

|            |                                      |                         |                                                            |                           |                           |
|------------|--------------------------------------|-------------------------|------------------------------------------------------------|---------------------------|---------------------------|
|            |                                      |                         | healthy individuals                                        |                           |                           |
| AC019193.3 | Lu <i>et al.</i> , (2020) [41]       | RNA sequencing and qPCR | 25 men with asthenozoospermia, 25 male healthy individuals | Seminal plasma (exosomes) | Downregulated in patients |
| AC068389.1 | Lu <i>et al.</i> , (2020) [41]       | RNA sequencing and qPCR | 25 men with asthenozoospermia, 25 male healthy individuals | Seminal plasma (exosomes) | Downregulated in patients |
| AL359771.1 | Lu <i>et al.</i> , (2020) [41]       | RNA sequencing and qPCR | 25 men with asthenozoospermia, 25 male healthy individuals | Seminal plasma (exosomes) | Downregulated in patients |
| AC008735.2 | Lu <i>et al.</i> , (2020) [41]       | RNA sequencing and qPCR | 25 men with asthenozoospermia, 25 male healthy individuals | Seminal plasma (exosomes) | Downregulated in patients |
| AC009093.4 | Lu <i>et al.</i> , (2020) [41]       | RNA sequencing and qPCR | 25 men with asthenozoospermia, 25 male healthy individuals | Seminal plasma (exosomes) | Downregulated in patients |
| LINC02320  | Lu <i>et al.</i> , (2020) [41]       | RNA sequencing and qPCR | 25 men with asthenozoospermia, 25 male healthy individuals | Seminal plasma (exosomes) | Downregulated in patients |
| AC022098.1 | Lu <i>et al.</i> , (2020) [41]       | RNA sequencing and qPCR | 25 men with asthenozoospermia, 25 male healthy individuals | Seminal plasma (exosomes) | Downregulated in patients |
| AC022098.2 | Lu <i>et al.</i> , (2020) [41]       | RNA sequencing and qPCR | 25 men with asthenozoospermia, 25 male healthy individuals | Seminal plasma (exosomes) | Downregulated in patients |
| AL513320.1 | Lu <i>et al.</i> , (2020) [41]       | RNA sequencing and qPCR | 25 men with asthenozoospermia, 25 male healthy individuals | Seminal plasma (exosomes) | Downregulated in patients |
| LINC00574  | Saberian <i>et al.</i> , (2021) [30] | qPCR                    | 31 AZ patients, 32 normozoospermic controls (NZ)           | Semen                     | Upregulated in patients   |
| CFAP44-AS1 | Kamel <i>et al.</i> , (2022) [36]    | qPCR                    | 34 AZ patients, 35 normozoospermic men                     | Semen                     | Downregulated in patients |
