# Supplementary material for: The Role of Long Noncoding RNAs on Male Infertility: A Systematic Review and In Silico Analysis
Source: Biology (Basel). 2022 Oct 15;11(10):1510. doi: 10.3390/biology11101510 (PMC9598197; doi:10.3390/biology11101510)
Supplement: Supplementary file 1 [file biology-11-01510-s001.zip]

Archive with 9 entries (9 files):
- Supplementary Table S1.xlsx
- Supplementary Table S2.pdf
- Supplementary Table S3.xlsx
- Supplementary Table S4.pdf
- Supplementary Table S5.pdf
- Supplementary Table S6.pdf
- Supplementary Table S7.xlsx
- Supplementary Table S8.pdf
- Supplementary Table S9.xlsx
