# Supplementary material for: The Role of Long Noncoding RNAs on Male Infertility: A Systematic Review and In Silico Analysis
Source: Biology (Basel). 2022 Oct 15;11(10):1510. doi: 10.3390/biology11101510 (PMC9598197; doi:10.3390/biology11101510)
Supplement: Supplementary file 1 [file biology-11-01510-s001.zip › Supplementary Table S1.xlsx]

## Sheet: Φύλλο1
Study	Country	Study Population	Sample Characteristics (Age, health status)	Biological Material	Methodology
Lü et al. (2015) [26]	China	Three patients (n=3)with MA (maturation arrest), two patients with hypospermatogenesis (Hypo) (n=2) and three controls (n=3)	Patients with NOA: aged 24–36 years and Control subjects: aged 48–60 years. All the subjects recrruited were undergoing orchiectomy for prostate carcinoma.	Testicular tissues	Microarray technology
Xie et al. (2020) [27]	China	RNA sequencing: 6 normozoospermic (n=6) + 5 NOA patients (n=5), Training set: 30 NOA (18 with successful sperm retrieval and 12 NOA patients for whom mTESE failed to obtain spermatozoa)(n=30), Validation set: 66 NOA (n=66), Decision-making set: 246 samples (n=246)	Patients with NOA: aged 31.20 ± 1.86, Normozoospermic men: 35.50 ± 2.36. NOA patients with Klinefelter’s syndrome, azoospermia factor (AZF) microdeletions, cryptorchidism-associated NOA (cryptorchidism or testicular atrophy after orchidopexy), idiopathic testicular atrophy (testicular size < 6 ml) and history of mumps orchitis were included except hypogonadotropic hypogonadism.	Semen samples - extracellular vesicles	RNA sequencing
Ata-Abadi et al. (2020) [38]	Iran	25 infertile men with varicocele (n=25) and 17 fertile men as controls (n=17)	No information about age. Men with leucocytospermia, azoospermia, seminal sperm antibodies, testicular size discrepancy, fever within 90 days prior to seminal analysis, cancer, abnormal hormonal profiles, recurrent varicocele, grade I varicocele, urogenital infections, previous history of scrotal trauma or surgery, drug consumption, excessive alcohol, or occupational exposure were excluded.	Semen samples	RNA sequencing
Su et al. (2019) [39]	China	16 patients with Hypo (n=16) and 16 control subjects (n=16)	No information about age and health status.	Testicular tissues	qRT-PCR
Zhao et al. (2018) [40]	China	56 patients with varicocele (n=56) and 28 healthy controls (n=28)	Varicocele patients (grade II): aged 32.35±3.56, varicocele patients (grade III): aged 34.46±3.04, healthy men: aged 32.32±3.12. Exclusion criteria included seminal infection, cryptorchidism, orchitis, testicular atrophy and long-term smoking history.	Sperm samples	qRT-PCR
Lu et al. (2020) [41]	China	25 male diagnosed with asthenozoospermia (n=25) and 25 male normal healthy individuals (n=25)	Cases: aged 35 ± 6.22, Controls: 34.7 ± 5.38. Patients with congenital or hereditary disease that cause gonadal dysplasia were excluded from the study. Patients with genitourinary infections, endocrine diseases such as diabetes and hyperthyroidism, severe heart, liver, kidney or other functional abnormalities were also excluded.	Semen Samples - Seminal plasma exosomes	RNA-sequencing
Kyrgiafini et al. (2020) [42]	Greece	76 normozoospermic individuals (n=76) and 83 non-normozoospermic (oligozoospermic, asthenozoospermic, teratozoospermic + combinations) (n=83)	All men: aged 18-40. None of the patients exhibited any fertility-related issues regarding varicocele or Y chromosome microdeletions.	Semen samples	GWAS
Saberiyan et al. (2020) [43]	Iran	32 patients with AZ (n=32), 35 patients with TAZ (n=35), and 34 people with normozoospermia (n=34)	AZ group: aged 32.13 ± 2.30, TAZ group: 34.26 ± 4.10, NZ group: 33.56 ± 4.22. Patients with abnormal parameters other than motility and morphology (such as pH, fructose level, and presence of white blood cells in the semen), identical genetic abnormality, reproductive system defect, and underlying diseases such as varicocele, anti-sperm antibodies, and childhood injuries were excluded from the st…	Semen samples	qRT-PCR
Kamel et al. (2022) [36]	Iran	35 TAZ patients (n=35), 34 AZ patients (n=34) and 35 normozoospermic men (n=35)	No information about age. Patients with abnormal sperm parameters other than motility and morphology (such as pH, fructose level and presence of white blood cells in the semen) were excluded from the study. The patients had no known reproductive system defect and underlying problems resulting in infertility, such as syndromic diseases, varicocele, anti-sperm antibodies and childhood injuries.	Semen samples	qRT-PCR
Sanei-Ataabadi et al. (2020) [34]	Iran	25 individuals with grade II or III varicocele (n=25) and 17 healthy donors with normal semen parameters without any clinical presentation of varicocele (n=17)	No information about age. Individuals with azoospermia, leukocytospermia, seminal sperm antibodies, fever within 90 days prior to the seminal analysis, cancer, abnormal hormonal profile, testicular size discrepancy, recurrent varicocele, grade I varicocele, urogenital infections, previous history ofscrotal trauma or surgery, drug consumption, excessive alcohol, and occupational exposure to heat w…	Semen samples	qRT-PCR
Sun et al. (2021) [37]	China	6 normozoospermic (n=6) and 6 oligozoospermic (n=6)	Patients with oligozoospermia: aged 37.67 ± 3.56, Normozoospermic: aged 32.83 ± 4.96. Cases and controls were closely matched for age, body mass index (BMI), and sperm DNA fragmentation index (DFI). The levels of reproductive hormones, such as follicle-stimulating hormone (FSH), luteinizing hormone (LH), and testosterone (T), were analyzed. No difference was observed in the levels of these hormon…	Semen samples	RNA sequencing
Saberiyan et al. (2020) [30]	Iran	31 AZ patients (n=31), 31 TAZ patients (n=31), and 32 normozoospermia controls (n=32)	NZ group: aged 33.50 ± 4.18, AZ group: 32 ± 2.46, TAZ group: aged 34.00 ± 3.98. No further information about health status.	Semen samples	qRT-PCR
Li et al. (2021) [28]	China	188 VC patients (n=188) and 92 healthy men (n=92)	Control group: aged 28.293 ± 4.893, VC group: aged 27.282 ± 5.200. The exclusion criteria were as follows: (a) individuals with other diseases that might affect semen quality (such as hypogonadism, epididymitis, testicular atrophy, cryptorchidism, obstruction of the vas deferens, Y chromosome microdeletions, orchitis and prostatitis); (b) those with hormone abnormalities; (c) those with concomita…	Semen samples - Seminal plasma	qRT-PCR
Zhang et al. (2015) [35]	China	45 healthy control (n=45), 45 asthenozoospermic patients (n=45) and 45 oligoasthenozoospermic patients (n=45)	All individuals were aged between 25 and 50 years. Control group: aged 33.4 ± 3.1, Asthenozoospermic group: aged 33.8 ± 3.6, Oligoasthenozoospermic: aged 34.3 ± 4.2. Men with varicocele, teratozoospermia and leukocytospermia were excluded. Additional exclusion criterions included abnormal semen liquefaction, reproduction tract infection, testicular injury or pathology, history of cryptorchidism, …	Semen samples	qRT-PCR
Cerván-Martín et al. (2021) [44]	Spain & Portugal	Cases: 674 SpF Iberian (Spanish and Portuguese) infertile men with azoospermia or severe oligospermia (480 NOA and 194 SO men) (n=674), Controls: 700 men representative of the general population (with self- reported fatherhood) as well as 358 men with proven normal sperm concentration in the ejaculate by semen analysis (n=1058)	No information about age. Individuals with abnormal karyotypes, chromosome Yq deletions and AZF microdeletions, a history of testicular disorders (such as orchitis, testis maldevelopment, bilateral cryptorchidism, bilateral varicocoele, and obstruction of vas deferens), or professional/environmental factors associated with low sperm counts were discarded from this study.	Peripheral blood	Genotyping
Zhou & Wang (2020) [45]	China	13 normozoospermic (n=13) and 8 teratozoospermic men (n=8)	All the individuals aged between 21-57 years. No further information about health status.	Semen samples	RNA sequencing
Sabetian et al. (2021) [33]	Iran	27 NOA (n=27) and 4 healthy individuals (n=4)	Control group: aged 41.75 ± 8.58, NOA post-meiotic arrest: aged 33.36 ± 5.98, NOA meiotic arrest: aged 31.57 ± 2.15, NOA meiotic arrest: aged 30, Sertoli cell only syndrome: aged 31.14 ± 0.89. No information about health status.	Testicular tissues	RNA sequencing
Bo et al. (2020) [29]	China	30 NOA (n=30) and 8 Normal (n=8) (training set), 31 NOA (n=31) and 8 Normal (n=8) (validation set), 27 NOA (n=27) and 4 Normal (n=4) (validation set)	No information about age and health status.	Testicular tissues	Microarray
Zhang et al. (2018) [31]	China	36 asthenozoospermic patients (n = 36) and 48 normal sperm samples (n = 48)	No information about age. Men with varicocele, reproduction tract infection, testicular injury, etc. were excluded.	Semen samples	RNA sequencing
Eggers et al. (2015) [32]	Australia	19 with histologically confirmed meiotic arrest (n=19), 110 men with azoospermia in the absence of histologic data (n=110), and 97 fertile men (n=97) (controls)	No information about age. Patients with known causes of male infertility were excluded, including those with obstructive azoospermia, chromosomal abnormalities (numerical and structural), Y chromosome microdeletions, cryptorchidism, varicocele, and previous cancer treatment.	Peripheral leucocytes (Blood)	SNP microarray
