# Supplementary material for: The Role of Long Noncoding RNAs on Male Infertility: A Systematic Review and In Silico Analysis
Source: Biology (Basel). 2022 Oct 15;11(10):1510. doi: 10.3390/biology11101510 (PMC9598197; doi:10.3390/biology11101510)
Supplement: Supplementary file 1 [file biology-11-01510-s001.zip › Supplementary Table S3.xlsx]

## Sheet: Azoospermia
A panel of extracellular vesicle long noncoding RNAs in seminal plasma for predicting testicular spermatozoa in nonobstructive azoospermia patients (Xie et al., 2020) [27]
DE lncRNAs (Normo vs NOA)
SPATA42
LOC105372578
LOC102724701
CDIPTOSP
XLOC_009943
LINC01921
XLOC_049485
LOC105377941
TBX18-AS1
CCDC37-DT
XLOC_040117
XLOC_026092
LINC00301
LOC100996249
XR_001741909.1
RBAKDN
LINC00608
GABRG3-AS1
LOC105374297
XLOC_010172
LOC440934
LOC101929534
LINC00982
ZNF649-AS1
LOC100505685
XLOC_043906
XR_922303.1
FLJ40194
ZNF503-AS1
LOC101929088
XLOC_018073
LIMS3-LOC440895
LOC103908605
LOC100499194
IGSF11-AS1
HAGLR HOXD
SNHG16
XLOC_020962
XLOC_007879
XLOC_019197
LINC00863
LOC105374841
XLOC_022308
PRC1-AS1
XR_001750932.1
DSG1-AS1
LOC105378449
XLOC_033119
LOC100507513
LINC01481
LOC100507006
PTOV1-AS2
LINC00710
XLOC_004949
XLOC_041633
XLOC_041630
C1QTNF3-AMACR
XLOC_008737
LOC102724238
SMAD1-AS2
LINC00343
LINC01018
THUMPD3-AS1
CATIP-AS1
XLOC_025805
XLOC_044703
XR_001756052.1
XR_001746469.1
LOC105378944
LINC00847
LOC730101
XR_941847.2
XLOC_054831
XLOC_032845
MIA-RAB4B
XLOC_045807
XLOC_021708
XLOC_022261
XLOC_045878
XR_001745642.1
XLOC_003108
XLOC_056350
LINC01229
XLOC_050196
XLOC_012676
XLOC_007739

## Sheet: Asthenozoospermia
RNA-sequencing and bioinformatics analysis of long noncoding RNAs and mRNAs in the asthenozoospermia (Lu et al., 2020) [41]
DE lncRNAs (Asthenozoospermia vs Normal)
AC009965.1
AC011444.3
AC019193.3
PCED1B-AS1
AL358234.1
AC121764.1
AC068389.1
AC019117.2
AC112176.1
AL359771.1
AC008735.2
AC022398.1
LSAMP-AS1
AC009093.4
AC025300.1
LINC02042
AL357153.1
LINC02402
LINC02320
AP002358.1
AL034397.3
AC022098.1
AC027315.1
LINC02172
AC022098.2
AC139491.2
SPRY4-AS1
AC138625.1
LINC01990
AC092747.4
IL21-AS1
AL513320.1
AL121992.2
LINC02076
AC010889.1
AC087301.1
AC013562.1
AC011473.1
AL121906.2
LINC01603
AC068672.3
AC090531.1
AL008723.1
AL512271.1
LINC02526
AC005703.1
AC024600.1
STEAP2-AS1
AL590666.2
AC078906.1
AL133215.3
LINC01640
AL359881.3
AL034546.1
LINC02527
LINC02549
AC090993.1
AC116003.1
CPS1-IT1
PCAT4
AC005753.1
AC104212.3
AC145423.3
AL133520.1
AC019211.1
LINC01613
AL122035.2
SYP-AS1
LINC02311
AC025181.2
AC104078.1
AP001363.2
AC018647.2
ZMIZ1-AS1
AC139749.1
PACRG-AS1
UCHL1-AS1
LIPC-AS1
AL356215.1
AL136964.1
PRICKLE2-AS3
AL353811.1
AC008443.4
AC106772.1
AC104119.1
AL163195.2
MIR181A1HG
LINC00893
AC139887.3
LINC01551
MUC2
LINC02432
LINC01039
AC004771.5
AL133387.2
AC008080.1
AC004941.1
AC004801.3
AC005842.1
AL136987.2
GLYCTK-AS1
AC100774.1
AC012494.1
AC011472.1
C12orf77
AC013460.1
AC010615.2
C5orf66
AC005034.3
LINC02056
AC105219.4
TEX26-AS1
AC024132.1
AL357054.4
AC012409.3
AL713998.1
LINC00533
AL049612.1
LINC02552
AC021079.1
AC006058.1
AP005229.2
AC022447.2
AC040963.1
AL138916.2
SPATA42
AC104964.2
AC007405.2
AP001528.1
AL590787.1
AC022113.2
LINC00640
GRM7-AS3
LMCD1-AS1
AP000223.1
AP001178.1
COX10-AS1
RUVBL1-AS1
LINC01405
AC145285.2
AC011196.1
AL049870.2
AL445647.1
LINC01271
LINC00940
AC090241.3
MIR497HG
AC009690.2
AL138781.1
AP003721.4
AC018742.1
LINC01471
HCG9
LUARIS
AC008870.4
AL513542.1
TMEM132D-AS1
AL355834.1
AL354824.2
LINC00894
AC114401.1
ALG9-IT1
AP003486.1
AL022334.2
AIRN
AL590730.1
AL162497.1
AC136944.2
AC022034.2
LINC02142
LINC00869
AC002480.2
FAM230B
AL138974.1
LINC01205
CADM2-AS1
LINC01879
MINCR
AC020663.3
AC007638.1
AC053503.4
AP001178.3
AC002553.1
AL355674.1
AC025539.1
AC015909.3
AL596220.1
AC018450.1
AP004609.3
AC105345.1
AC005828.5
AL132712.2
LINC00863
AC012507.2
AC021006.2
AP000302.1
AC011473.3
AL445250.1
TTTY15
AC068633.1
AC018541.1
AL138756.1
AC105105.4
AL353593.2
AC092159.2
AP4B1-AS1
AL591806.1
CSMD2-AS1
AC010247.2
AL138830.2
AL360014.1
AC068870.1
RRS1-AS1
LINC00502
KRBOX1-AS1
LINC01914
AC023906.2
AC069209.1
AC026691.1
C3orf67-AS1
PWRN1
AL355802.1
DPP10-AS1
AC015813.1
MIR2052HG
AC084816.1
AC005291.1
AC020915.4
AL137005.1
AL109917.1
TRIM52-AS1
LINC01989
AL080317.3
AC009093.2
AL162386.2
ELFN1-AS1
AC048382.1
AC083843.2
LINC02117
DIO2-AS1
LINC02005
AC125603.2
AL513318.2
LINC02347
AC090337.1
AC004687.1
AL360089.1
AP000894.2
HMGA1P4
AC091045.1
LINC00871
D21S2088E
AL391704.3
LINC00222
AC068446.2
AL031673.1
AC103957.1
AC008440.1
AL451165.2
BSN-AS1
AC092979.1
AC005070.3
LINC01620
AC138123.3
LINC02511
Z69706.1
AP003032.1
AC004828.1
LINC02158
MGC27382
TAPT1-AS1
AC241644.2
AC106801.1
AC068594.2
LINC01865
AL513303.1
AC108515.1
PLCE1-AS1
AC092447.5
AC012123.1
AC073263.1
Z82186.1
GPR50-AS1
LINC00658
AC096642.1
AC021087.3
LINC02016
AC131097.3
AC016700.3
LINC01441
AC020658.2
FGF13-AS1
AC093714.2
PCAT6
AL356310.1
LINC01235
LINC02086
CDKN2A-AS1
AC128685.1
LINC01217
AC009271.1
AC008742.1
AL137246.2
AC138474.1
EDRF1-AS1
HOTAIR
PAPPA-AS2
AL161636.1
AL132796.1
AL513478.2
AC083949.1
LINC02303
LINC02249
CBR3-AS1
AC020612.3
LINC00442
IGF2-AS
LINC02006
LINC01091
AC002519.1
AC122683.1
LINC02509
AL451050.2
AL161938.1
AC004477.1
AC002470.1
AL117335.1
AP000866.5
AL117329.1
AC015712.1
BARX1-AS1
AC026391.1
AC073073.2
AC010530.1
ARHGAP26-AS1
AC136618.1
AC098820.1
AC090023.1
AC239803.1
LINC01979
AP001442.1
LINC00954
AL354733.2
AL390860.1
AC068418.2
AP003392.1
AC108210.1
AC079385.1
AC012593.1
AC003102.1
TMEM72-AS1
AP006545.1
AC074035.1
AC006299.1
AC145124.1
LINC01619
LINC02026
AL592464.1
AP003472.2
AC027279.1
LINC00824
ZBED5-AS1
AP005233.1
AP000640.1
AL512380.1
AL133467.1
AC093609.1
AC008083.3
AC132192.2
LINC01087
Z82202.1
GS1-24F4.2
AF131215.5
AC007608.3
SLC25A5-AS1
TGFB2-AS1
AC093909.4
AC016949.1
AC011840.1
AL049569.1
AC124069.1
GAS6-AS1
AC034238.1
AC090774.4
AC004847.1
AC090592.1
LINC00930
AC090970.2
AC026462.4
LINC01093
AC012676.3
AL031428.1
AC012613.2
CLDN10-AS1
AC017002.3
AP002008.1
LINC01446
AC006538.3
AL691447.2
CELF2-AS2
LINC01111
AP003500.1
LINC02408
AP000688.2
AC100797.1
PCAT19
AC093799.2
AC092620.3
AC123912.2
AC007998.3
LINC01168
AL161668.3
AC018766.1
AC007601.1
AL050327.1
AP001781.2
AC023590.1
AC002463.1
AC010729.1
AP000424.1
AL589935.1
AC079922.2
LINC00173
AC005392.1
AC023830.3
LINC01821
AC004854.2
AC008781.3
LINC02018
AC092171.4
LINC01497
LINC02318
ARHGAP5-AS1
C9orf147
AL161644.1
AL445488.1
AC010761.4
AC012368.1
LINC01106
AL023754.1
AL390778.2
NEXN-AS1
AC022031.2
AP005329.2
AC010542.4
AC073263.2
AL360270.2
LINC00265
AP002761.4
AL133387.1
AC005005.3
AL137058.1
AL596325.1
AC083798.2
AC004801.5
AC097173.2
AC007496.2
LINC00355
LINC01443
AC010395.1
AC091962.1
LINC01468
AL109615.2
AL390728.5
AC109495.1
AJ009632.2
AC100858.3
AC006145.1
AC022710.1
AC108861.1
VIPR1-AS1
AC112484.2
KIRREL3-AS3
AC100807.1
LL22NC03-63E9.3
LINC02507
LINC01020
AL590677.1
AC073521.1
FGF14-IT1
MYLK-AS1
LINC02219
AP001258.1
AL590004.3
LINC01572
C2-AS1
LINC02316
AL445183.2
AC092634.5
LINC02440
AL132639.2
Z92544.2
AP000688.1
AC116903.2
RUSC1-AS1
TAB2-AS1
AC021066.1
AL008729.1
AC110760.2
AC137767.1
LINC01733
LINC01582
AC005261.3
TRPM2-AS
LINC01029
LINC01666
LINC01108
AC009404.1
AC006064.2
AC093297.3
LRRC2-AS1
LINC00269
AC008429.1
RTCA-AS1
LINC01167
AL122058.1
LINC00486
AC090572.2
AL139348.1
AP003555.2
AL117336.3
AP002765.2
AL078612.2
LINC00348
LINC01816
AC138089.1
CASC23
LINC01976
AC007386.2
AL590408.1
HCP5
VPS9D1-AS1
FARSA-AS1
AC138356.3
AL357093.2
AC044802.1
AC107375.1
AC129510.2
PPP3CB-AS1
LINC02157
LINC02390
AL022323.3
AC073342.2
MRGPRG-AS1
AC022154.1
LINC00454
AL731533.2
AC005858.1
AL035446.1
AC015969.1
LINC00678
LINC01503
NCRNA00250
AC068888.1
AC010601.1
AL157714.2
HCG27
LINC00868
LINC00113
AC110011.1
AL591686.1
CLSTN2-AS1
LINC01270
AP000679.1
AC102797.1
AC113383.1
AFAP1-AS1
LINC00370
F11-AS1
AC110760.1
AF127577.2
LINC02471
AC004053.1
AL512770.1
AC027801.1
AC022517.1
LINC02261
FAM167A-AS1
AC097467.3
AL645728.1
AC009961.1
LINC02458
CSTF3-AS1
AC025465.1
AC006504.2
LINC01793
AL137025.1
AL034417.2
AC011447.3
AC135895.1
AC007743.1
AC008938.1
AL133215.2
AC068075.1
LINC01123
AC083906.3
AL035661.1
C20orf203
PCOLCE-AS1
LINC01578
AC005062.1
EFCAB6-AS1
PRKCQ-AS1
AC122719.1
AL035530.2
AL008721.1
AC245884.11
LINC02363
AC107959.3
LINC00907
AC007996.1
ZFHX2-AS1
AL049749.1
AL139420.1
AL161457.2
AC092422.1
LINC01355
AC080013.5
TUSC8
LINC01410
AL121761.2
AC027682.5
FAM99B
AP003355.2
AC005291.2
AC011474.1
ZNF213-AS1
AL136537.1
KIRREL1-IT1
AL391069.3
AC008592.2
AC016924.1
AL008727.1
AC006116.9
AL139353.2
AC022893.2
AC092839.1
AC079610.1
AC027237.4
LINC01854
AC016027.2
AC092683.1
LINC00410
KRT7-AS
AC108024.1
AC007114.2
AC005550.3
AC009145.3
AC002985.2
AL606970.3
AP003555.1
AC107980.1
LNX1-AS1
AC000120.1
AC019118.2
AC233701.1
LINGO1-AS1
LINC01855
AC008154.1
AC117500.2
AC020661.1
MIR17HG
AC008514.1
AL031595.2
AL031717.1
BX640514.2
AL357078.3
AL355303.1
AP002986.1
AL596442.2
AC141928.1
LINC01378
LINC02179
LINC01005
HDAC2-AS2
PIK3CD-AS2
AC067863.2
AL135960.1
Z99916.1
AC113167.1
AC002464.1
AC244502.1
SRRM2-AS1
AC016738.2
AL117382.1
RNF217-AS1
CPEB1-AS1
AL138921.1
AL161793.1
LINC02525
AL357936.1
LINC01483
MIR4422HG
LINC00667
AC007216.3
AC083973.1
LINC00971
AC006305.1
AC017007.5
AL132796.2
LINC01043
AL137127.1
AC087885.1
AC010654.1
LINC02199
AC073133.2
AC234782.2
LINC01116
AF274855.1
LINC01772
LINC01812
AL357033.3
FRMD6-AS1
AC106779.1
AL353743.2
AC021192.1
LINC00698
AL360295.1
AC063944.1
AC116003.2
AC004852.2
AC005480.1
AC016866.1
LINC01647
LINC00297
AC099681.3
LINC00858
HMGN3-AS1
GTSE1-AS1
RAI1-AS1
AC244100.2
AC080013.1
AC005618.1
LINC01722
C1orf195
AL021393.1
AL359924.1
AC004803.1
AC068700.1
AC079336.3
AC114689.3
AL035252.2
BX284668.2
FP325330.3
MIR4527HG
LINC01520
AL596202.1
AC068490.1
GPR158-AS1
AC093422.2
AL365436.2
TMEM26-AS1
AC018697.1
AC098829.1
LINC00662
LINC00550
KRT73-AS1
AF274858.3
AL357060.2
AC007388.1
LINC02516
SFTA1P
AC006483.2
LINC01255
AL355581.1
AC006333.1
AP003027.1
AC243836.1
PSMA3-AS1
AL121809.1
DAOA-AS1
AL391845.2
LINC01775
AC020916.1
FOXN3-AS1
CPB2-AS1
AC243571.2
LINC01358
AC087482.1
AC092667.1
AC109460.2
LINC02539
AC010776.3
SPATA8-AS1
DLEU2L
AC016205.1
AC217774.2
AC105052.3
AC114760.2
AC079612.1
LINC02376
THUMPD3-AS1
LINC01840
LINC01359
MAP3K20-AS1
C8orf34-AS1
AL031666.2
SHANK2-AS1
SNHG3
FAM181A-AS1
HNF1A-AS1
AC021915.1
ZNF710-AS1
LINC01654
AC124312.2
AC140725.1
AC010139.1
AL022238.2
CECR3
AC110741.1
AL033504.1
AL449403.1
AL590683.1
AP001094.3
AC068473.5
AC022679.2
LINC02015
AC017074.2
AC025263.1
LINC02109
AC025871.2
AC007285.1
AC090458.1
TEX41
LINC01761
LINC00488
AC104823.1
AC091138.1
AC073176.2
BANCR
AC021491.4
AC023932.1
AC016355.1
ITGB2-AS1
MYCNOS
LINC01251
LINC01653
LINC00200
AC091820.2
APTR
AC008669.1
AL591030.1
AC099506.1
LINC01562
UGDH-AS1
AC108866.1
AC104695.1
AL157834.1
AC133785.1
AC109471.1
FAM30A
AC092958.1
AL139142.1
LINC00905
LINC01993
AC078842.2
AC068389.3
AC027020.2
AP003119.3
Z98885.2
LINC02151
AC092828.1
AL160006.1
AC097534.2
MIR4435-2HG
AC097512.1
U47924.3
THAP9-AS1
AL731567.1
AC083841.1
LINC01285
AC011365.1
LINC00498
AC007163.1
AC005332.8
AATBC
AF106564.1
ZNF503-AS1
AC004039.1
AC090791.1
LINC00602
AC008147.2
AC002378.1
AC099673.1
AC013356.2
CYP4A22-AS1
AC048382.5
AL591503.1
AC004917.1
AL137782.1
AC026271.4
LINC01770
IGFBP7-AS1
AL445248.1
MCM8-AS1
HNF4A-AS1
LINC01322
SRD5A3-AS1
AC068987.1
NPHP3-AS1
LINC01646
NKX2-1-AS1
C20orf78
AP000550.1
AC013549.1
LINC02337
LINC01708
AL354740.1
LINC01393
MTOR-AS1
AL358613.1
BX248123.1
LINC01203
AC007557.1
FAM155A-IT1
AL365500.1
AC108051.1
AC073050.1
LINC01890
BX322559.1
AL358452.1
AL359636.1
AL353633.1
AL451062.1
AC096644.1
AC010745.4
AC012370.1
AL022332.1
LINC02530
AL139042.1
AC007314.1
LINC02154
AL391704.2
AC011995.2
AC097066.1
LINC00881
AL627309.5
AC112219.1
AC016642.1
AC008588.1
AC008771.1
AC113349.1
PANCR
AC008840.1
AC092611.1
AC079795.1
AC104791.1
WASHC5-AS1
LINC01298
AC084128.1
AC079209.2
AC087269.1
AP000873.4
AC108136.1
AP000640.2
AC063926.1
CACNA1C-IT3
MIR200CHG
AC067735.1
AC078880.2
AL049833.1
AC005520.2
AC009432.1
AC046168.2
AC012050.1
AC025259.3
AL360157.1
AC106785.2
AC027688.2
AL591643.1
AC026462.3
AC110491.1
AC108860.2
AL359752.1
AC118755.1
AC100832.2
AC115989.2
AC022211.3
AP001020.3
AC025048.1
LINC01864
AC016590.2
AC012313.2
AC008739.1
AC009955.4
AC010618.2
AC068313.1
AL355297.4
AC005696.3
AC144652.1
AL135936.1
AL031670.1
AC127024.6
AL445649.1
AC233263.6

## Sheet: Teratozoospermia
Identification of male infertility-related long non-coding RNAs and their functions based on a competing endogenous RNA network (Zhou & Wang, 2020) [45]
DE lncRNAs (Teratozoospermia vs Normal)
LINC00467
ΙGSF11-AS1
MALAT1
RNF157-AS1
MIR663AHG
PRMT5-AS1
OTUD6B-AS1
ZBTB20-ASI
SMAD1-AS2
SLIT2-1T1
LINC00710
EPB41L4A-AS1
AC008088
AF001548
CASC16
LINC00347
LINC00658
SNHG19
LINC00844
FAM181A-AS1
LARGE-AS1
LINC01364
SCAMP1-AS1
BVES-AS1
ST7-AS2
LINC01116
PGPD4-AS1
USP3-AS1
LINC01350
SPATA3-AS1
RBAKDN
HLA-F-AS1
PITPNA-AS1
FIRRE
LINC01282
LINC00545
LINC00845
ZNF252P-AS1
CASC6
RAP2C-AS1
STAM-AS1
TOB1-AS1
LINC00645
LINC01091
LINC00853
A1BG-AS1
CDKN2B-AS1
BFSP2-AS1
LZTS1-AS1
LINC01213
LINC00629
LINC01352
STAU2-AS1
SEPSECS-AS1
LINC00276
GHET1
C12orf77
AC092620
ARHGEF26-AS1
NEGR1-ΙΤ1
TRG-AS1
LINC01111
LINC01305
KRTAP5-AS1
LINC01425
PRICKLE2-AS3
FAM13A-AS1
LINC00266-1
LINC01448
AL022344
EP300-AS1
HYMAI
GLIDR
RHPN1-AS1
AQP4-AS1
SENCR
TMEM254-AS1
HOXC-AS3
PRR7-AS1
LINC00668
DCTN1-AS1
LINC01029
COX10-AS1
CASC11
LINC01355
NNT-AS1
LINC00877
SLC16A1-AS1
LINC01359
LINC00592
LINC00944
BANCR
ELOVL2-AS1
AP000525
FRMD6-AS1
LINC00466
C7orf69
ACVR2B-AS1
SEC24B-AS1
ADARB2-AS1
PARD6G-AS1

## Sheet: Oligozoospermia
LncRNAs induce oxidative stress and spermatogenesis by regulating endoplasmic reticulum genes and pathways (Sun et al., 2021) [37]
DE lncRNAs (Oligozoospermia vs Normal)
lnc-GNS-3
XLOC_515910
lnc-SERHL2-7
lnc-IL31RA-1
lnc-NLRP2-2
lnc-CDK12-2
XLOC_1093926
lnc-LRRC38-2
lnc-FOXN1-1
lnc-SLC46A2-1
lnc-CSNK1A1-7
lnc-PHLDB1-1
lnc-KB-1980E6.3.1-6
lnc-LAT2-2
XLOC_2394941
lnc-EEF1B2-3
lnc-AP3S1-15
lnc-SLA2-1
lnc-RAPH1-6
lnc-TICAM1-1
lnc-FAT2-1
lnc-C11orf49-3
lnc-MMP15-1
lnc-DYNC1I1-5
lnc-MFSD9-4
lnc-DYSF-12
lnc-PTGER4-4
lnc-KIAA1429-6
lnc-MYL4-1
lnc-CCDC83-1
lnc-LRRN4-2
XLOC_376899
lnc-NFAT5-1
XLOC_1014483
lnc-PINK1-2
XLOC_1176066
XLOC_1174083
lnc-ADAMTS18-1
lnc-CHRNA9-2
XLOC_1230520
lnc-MDM4-8
lnc-WDR41-1
lnc-EEF1A1-1
lnc-PI4KA-2
lnc-TUFM-1
lnc-TUBGCP4-1
lnc-MMP23B-3
XLOC_002818
lnc-ERP44-1
lnc-LEO1-4
lnc-CHADL-3
lnc-SAR1B-1
lnc-GPRC5D-1
RAP2C-AS1
lnc-UGP2-4
lnc-GLRX2-1
lnc-KIAA1731-1
lnc-ING1-3
lnc-IGFBP7-1
lnc-TRAPPC4-1
lnc-AMDHD1-3
CFLAR-AS1
lnc-FAM82A1-10
lnc-ATP6V1C2-4
lnc-LEPRE1-1
lnc-GTPBP1-1
lnc-ZNF445-4
lnc-SKA2-2
lnc-LPIN2-1
lnc-POLH-1
lnc-GADD45A-2
MYLK-AS1
XLOC_2218192
XLOC_1177405
lnc-C17orf63-2
lnc-AC006050.2.1-6
lnc-FAM102B-2
lnc-C14orf102-1
lnc-AC011443.1-4
XLOC_000300
lnc-MPI-1
lnc-RNF146-2
XLOC_1625085
XLOC_515249
lnc-ANGPT2-2
lnc-AMDHD1-2
lnc-RASAL1-1
lnc-AIDA-1
LYPLAL1-AS1
lnc-SH3RF2-1
lnc-TMEM194B-6
lnc-C3orf17-2
lnc-AP1S2-1
XLOC_379275
lnc-BRMS1L-7
lnc-NUDT5-1
XLOC_1176619
POTEH-AS1
lnc-SLC39A6-1
lnc-SLC25A47-2
lnc-PIGU-3
XLOC_2558149
lnc-RB1-2
lnc-OTP-5
lnc-SPTBN5-2
lnc-NDUFAF2-1
lnc-MPHOSPH10-2
lnc-ID4-2
lnc-NEK5-1
lnc-ZNF83-4
UBXN7-AS1
XLOC_847052
lnc-SLC25A29-1
lnc-CCDC152-2
lnc-TAF1A-1
lnc-AF127577.1-3
XLOC_753553
lnc-BLNK-4
lnc-WDR81-2
lnc-ATP11B-6
lnc-LRRC1-5
lnc-MIXL1-2
lnc-USP50-1
lnc-SKIV2L2-1
lnc-IQCG-6
XLOC_516712
lnc-AC018816.3.1-11
lnc-TESC-4
lnc-SPIN3-5
lnc-RIMS3-2
lnc-ANKS6-1
lnc-TRIP10-4
lnc-POC1B-GALNT4-2
lnc-THRSP-2
lnc-TUBGCP6-5
EVX1-AS
lnc-ZNF613-7
lnc-SETD1B-3
lnc-PIGB-2
lnc-PAICS-2
lnc-PPP4C-8
lnc-MORC2-1
lnc-CHSY1-6
IDI2-AS1
lnc-ORC3-2
PITPNA-AS1
XLOC_375822
lnc-KLHL25-6
lnc-FAM210A-2
lnc-IQCG-2
lnc-CRHR1-5
lnc-ETNK2-7
lnc-SPERT-4
lnc-PSMB11-1
lnc-PSME4-2
ITGA9-AS1
lnc-CEMP1-10
XLOC_754873
lnc-HDLBP-3
lnc-KATNAL2-5
lnc-AC127496.3-7
lnc-IL2RG-4
lnc-WDR67-1
lnc-POLR1E-4
lnc-ID2-1
lnc-PNMA2-1
lnc-ZNF775-1
lnc-SEC22C-2
lnc-DDX19B-2
XLOC_514233
lnc-TMEM123-1
lnc-LETM2-5
lnc-HMBOX1-8
lnc-TSPYL4-1
lnc-AC091132.1-3
XLOC_847185
lnc-C3orf24-1
lnc-ZNF257-5
lnc-B9D1-1
lnc-VTCN1-3
lnc-TMEM150A-1
lnc-TTC26-4
lnc-VN1R2-3
lnc-KCTD4-1
lnc-DNAJA1-1
XLOC_2217833
XLOC_1017529
IDH1-AS1
XLOC_754819
lnc-MOCS2-3
lnc-GPLD1-1
lnc-APC-4
lnc-LOXL1-1
lnc-LMAN2-1
lnc-KIAA0319-1
lnc-TCP1-2
lnc-TNFRSF11B-2
lnc-LRRC57-1
lnc-TMEM138-4
lnc-TRMT2A-1
lnc-LXN-1
lnc-SHARPIN-4
lnc-KIAA0664-2
lnc-YIF1A-4
XLOC_1828067
lnc-RHOQ-2
lnc-UMODL1-7
lnc-SNRNP35-1
lnc-RFC4-1
lnc-FKBP2-1
lnc-TUSC5-5
lnc-C4orf21-1
lnc-ZBTB25-2
XLOC_1232514
CNOT10-AS1
CASC15
lnc-MFSD4-1
lnc-TIGD1L2-6
lnc-ODZ1-6
lnc-WDR45L-1
lnc-ZNF687-1
lnc-PPAP2A-1
lnc-PEAK1.1-5
MCCC1-AS1
lnc-GATAD2B-1
XLOC_1625271
lnc-MPEG1-2
lnc-SLC24A5-5
lnc-SIGLEC16-4
lnc-LEP-1
lnc-SNTG2-3
lnc-CHRNA3-5
lnc-ARL1-3
lnc-CREG1-2
lnc-RP11-712L6.5.1-3
lnc-KRT80-10
lnc-TOMM20L-1
lnc-RP11-324D17.2.1-3
lnc-MRPL47-2
lnc-CLVS1-1
lnc-C16orf58-5
lnc-C17orf48-1
lnc-SLC38A8-9
lnc-DLEU7-5
lnc-SP110-5
lnc-TMEM50B-3
XLOC_1176366
lnc-TAOK3-9
lnc-RP11-116D17.1.1-10
lnc-OR7C2-1
lnc-HSP90AA1-1
lnc-FGFBP1-1
lnc-LIPG-2
lnc-ALPK2-6
lnc-PPIAL4C-9
lnc-S100A13-1
lnc-GLCCI1-1
lnc-CCDC68-1
XLOC_1174702
lnc-SEPT14-2
lnc-RFXAP-2
lnc-IKZF2-9
ARSD-AS1
lnc-ZFAND3-4
lnc-GLDN-3
lnc-ZNF45-2
lnc-MAP6-1
lnc-ESD-1
lnc-PHLPP2-1
lnc-AGMAT-4
lnc-NBPF15-2
lnc-ST3GAL1-1
PCBP1-AS1
lnc-CHAD-3
lnc-INTS12-2
lnc-IRF1-4
lnc-AARS-1
XLOC_1483332
lnc-ZNF738-5
lnc-DNAJA4-1
lnc-FAM198B-1
RNF157-AS1
lnc-KIAA0196-5
lnc-RPS4XP21-1
lnc-STAT1-1
lnc-PHYHIP-1
lnc-RNF121-5
lnc-PARN-10
lnc-MANSC4-2
lnc-PPP1R26-1
lnc-LRSAM1-1
XLOC_1585064
lnc-ARL13A-1
lnc-C1orf201-3
lnc-C5orf39-3
XLOC_1174283
lnc-C14orf28-2
lnc-TMUB2-1
XLOC_1175795
lnc-AP3S1-4
lnc-TMEM41B-4
lnc-OAZ3-6
XLOC_1623391
lnc-MFN1-1
lnc-STAG3L4-5
lnc-ORC3-1
XLOC_1176581
CASK-AS1
lnc-USP35-3
TAB3-AS2
lnc-PARP2-1
lnc-RHOQ-1
XLOC_2712800
lnc-SLTM-1
lnc-FABP3-1
lnc-MAPK6-9
lnc-AC079341.1-10
lnc-SLC3A2-3
lnc-C5orf49-1
lnc-AC127496.3-6
lnc-ZNF681-2
lnc-SMARCC2-5
lnc-CYB5D2-2
XLOC_2028126
lnc-SH3BGRL2-9
lnc-H2AFY2-1
lnc-HPCAL1-2
lnc-SHANK2-3
lnc-CYB5R2-3
lnc-KCNH5-3
XLOC_847555
XLOC_651258
lnc-SPRYD3-1
lnc-SLC25A21-4
lnc-GOSR2-2
lnc-C6orf108-1
lnc-ZNF514-2
lnc-ASCC2-1
lnc-AP3S1-1
lnc-SNX20-5
lnc-TRAPPC12-1
lnc-TMEM164-2
lnc-CPM-1
lnc-AC002553.1-1
lnc-NPAS2-2
lnc-STAP1-12
lnc-ARHGAP32-4
lnc-NDUFAF3-1
lnc-GCC2-1
lnc-C20orf187-1
XLOC_845645
lnc-AC007390.5.1-4
lnc-COTL1-2
XLOC_515042
lnc-HAAO-1
lnc-CBR1-1
lnc-SCD-2
lnc-PDGFRL-2
XLOC_000108
lnc-CCDC148-1
lnc-HMGB2-1
lnc-PNO1-1
lnc-CCRN4L-14
lnc-ARHGEF40-1
lnc-ZFYVE9-1
lnc-ALX4-5
lnc-PCM1-3
XLOC_1233095
lnc-RC3H1-1
XLOC_1622587
lnc-RFC2-4
lnc-DLX2-3
lnc-PPP1CB-1
C15orf59-AS1
lnc-INTS12-1
lnc-MYL12A-1
lnc-DNASE1L2-1
lnc-PPP1R14B-1
lnc-USP45-1
lnc-ANGPTL2-1
lnc-KCNT1-7
XLOC_1235635
lnc-FKRP-1
lnc-SNX20-3
lnc-BRI3-1
lnc-C5orf35-3
lnc-RANBP1-1
lnc-FAM43A-2
lnc-ZNF582-3
XLOC_1622484
XLOC_2834721
lnc-PDZD7-2
lnc-RELL2-1
XLOC_2218929
lnc-TMTC3-14
lnc-MRP63-6
lnc-PSMC3IP-1
lnc-USP50-2
lnc-IRAK4-2
lnc-C18orf42-3
lnc-PDZD9-1
lnc-FEM1A-4
lnc-ZNF780B-1
XLOC_001052
lnc-TMEM22-2
lnc-ORC4-1
lnc-MAP4K3-2
ZSCAN16-AS1
lnc-MTIF3-2
lnc-PTDSS1-1
lnc-GIP-5
lnc-MRPS11-2
lnc-GTF2F2-7
lnc-TNIP2-1
XLOC_375824
lnc-GPS1-1
lnc-LEO1-2
lnc-CHST7-2
lnc-NDE1-3
lnc-CNDP1-1
lnc-JAG1-1
XLOC_1174717
lnc-KBTBD3-1
LINC01091
lnc-TMEM85-2
lnc-HCRTR1-1
lnc-KIAA0020-7
lnc-MARCH4-1
lnc-ST7L-3
lnc-COIL-2
lnc-C1orf56-1
lnc-BCL2L13-3
lnc-NFKBIB-5
lnc-MZT2B-1
lnc-ANKMY2-1
lnc-MEST-2
lnc-CYTH4-4
XLOC_1831791
lnc-PRPF4B-5
lnc-PAH-3
SBF2-AS1
lnc-ZNF575-1
XLOC_1623353
lnc-CD53-2
XLOC_1484827
lnc-TMEM75-8
lnc-SETD8-1
lnc-NSUN7-1
lnc-ARMC2-1
lnc-OTUD6B-2
lnc-ACSBG1-4
lnc-CYS1-5
lnc-ALG3-3
lnc-EEF1B2-2
lnc-ZNF841-2
lnc-ATM-1
lnc-SCN2A-6
lnc-IRGM-1
lnc-MTMR2-2
lnc-TAL2-2
lnc-ZNF727-6
lnc-HSPG2-1
lnc-CTRB1-2
lnc-ZNF506-2
lnc-ZNF740-2
lnc-FAM164C-2
lnc-TRIAP1-2
lnc-RNF208-1
lnc-BCL6-9
lnc-RNF149-2
lnc-PIGL-1
PRMT5-AS1
lnc-TMEM50B-2
lnc-MRTO4-2
lnc-EDC3-5
XLOC_1482847
lnc-PSMC1-1
lnc-POC5-1
lnc-EGR4-2
lnc-RPS27L-1
lnc-CTNS-1
lnc-EPOR-2
lnc-MARCH10-1
IGBP1-AS2
lnc-RAB3A-3
lnc-PPP1R13B-1
lnc-TMEM180-3
lnc-UBE2B-1
lnc-LSS-1
lnc-FDFT1-1
lnc-CHAC1-4
lnc-ZNF792-5
XLOC_1484828
lnc-MEPCE-2
XLOC_1623747
lnc-LSM5-2
lnc-TEFM-5
lnc-AP002414.1.1-1
lnc-ATP6V1C2-2
lnc-PTDSS2-1
lnc-LTBR-6
lnc-C4orf37-2
XLOC_931187
lnc-CREM-6
lnc-DUSP11-4
lnc-GAS8-1
lnc-COMMD1-1
lnc-CBY3-3
lnc-NAA11-1
lnc-SEBOX-1
lnc-CCNI-3
lnc-SLC16A6-2
lnc-AC008073.6.1-2
lnc-ZNF382-1
lnc-DPCD-3
lnc-PPP4C-1
lnc-OR4M2-12
lnc-PABPC1L2B-2
PLA2G4C-AS1
lnc-MLST8-1
lnc-POTEB-5
lnc-A1BG-3
lnc-C1orf132-1
XLOC_2836988
lnc-ANKRD30A-5
GLYCTK-AS1
lnc-SH3RF1-2
XLOC_2714423
XLOC_2395743
lnc-PRDM2-2
XLOC_1176009
lnc-RIMS3-3
lnc-RNF24-5
lnc-SYNE2-1
lnc-NID2-5
lnc-STS-1
lnc-SLC2A6-2
lnc-CHMP4C-2
lnc-FABP3-3
lnc-PEA15-1
lnc-CCDC125-22
XLOC_932582
lnc-HCN3-1
MEF2C-AS1
lnc-NT5DC2-1
lnc-RPL14-2
lnc-POU5F1B-10
lnc-CSMD1-7
lnc-RAD9B-1
lnc-MKLN1-1
lnc-ZNF146-1
lnc-SLC25A16-2
lnc-EIF2B1-3
lnc-TUBA1C-3
lnc-CDKL1-1
lnc-TNP1-4
lnc-C1orf106-1
lnc-CALHM1-1
lnc-TMEM220-1
lnc-C4orf34-3
lnc-DSCC1-1
XLOC_376348
lnc-CD151-2
lnc-RAB17-2
lnc-ABCC3-1
XLOC_2839044
lnc-DENND4C-1
lnc-LSG1-4
XLOC_515583
XLOC_1014164
lnc-FAM183A-3
lnc-WDR77-2
XLOC_2028132
lnc-ZNF701-2
lnc-FTSJ3-1
XLOC_2993599
NCBP2-AS1
lnc-SMARCC2-7
lnc-ATP6V1G3-4
lnc-AF131216.6.1-2
lnc-KANK3-3
lnc-PADI4-2
lnc-ZNF423-3
lnc-DNAJC5B-1
XLOC_1178154
lnc-C5orf32-3
lnc-C12orf40-3
XLOC_2220896
lnc-C9orf57-3
XLOC_1175511
lnc-LRRFIP2-1
lnc-THSD4-4
lnc-SPATA12-2
lnc-CTSZ-7
lnc-RMI1-1
lnc-GPR160-1
lnc-TFB2M-1
lnc-PNLIPRP1-1
lnc-MFSD2A-1
THRIL
lnc-ZNF175-1
lnc-PMM2-1
lnc-CPT2-3
lnc-RPS24-8
lnc-ILKAP-4
lnc-IL10RB-3
lnc-PTGDR2-1
lnc-OXSM-2
lnc-WRNIP1-3
lnc-GAMT-7
lnc-TRNT1-1
lnc-CSMD1-18
lnc-VRK3-2
lnc-UNC93A-3
lnc-AMDHD2-2
LINC01224
lnc-MYO6-10
XLOC_2393515
lnc-TRMT1L-2
XLOC_1829717
lnc-ODF3L2-2
MIR4435-2HG
XLOC_846837
lnc-CCNB1IP1-2
lnc-RCAN3-1
lnc-LOH12CR1-1
lnc-ZNF394-1
lnc-PTPLA-2
lnc-PDZD7-1
lnc-RPUSD2-1
XLOC_514513
lnc-HSPB7-1
lnc-VPS4B-1
lnc-ZFYVE1-1
lnc-FAM57A-2
lnc-C9orf152-5
lnc-FMN1-2
lnc-SUSD1-1
lnc-TSC1-1
lnc-DHX57-1
lnc-QDPR-2
lnc-MTRR-7
lnc-GGCT-1
lnc-CKAP4-1
lnc-NAA50-1
lnc-C8orf56-3
lnc-GPBP1-3
lnc-NLRP3-4
lnc-SAA2-2
XLOC_2840550
lnc-WDR86-2
lnc-ZNF551-2
lnc-ZNF836-2
lnc-HDLBP-2
lnc-AC010336.2-1
lnc-ZNF45-4
lnc-NUP107-1
lnc-PHF10-1
HAGLROS
lnc-PRDM14-5
lnc-AP005482.1.1-2
lnc-RUNDC3B-1
lnc-DDX27-3
lnc-ZNF486-6
lnc-TM2D2-1
lnc-PEX7-2
lnc-CCL27-1
lnc-MATN2-1
lnc-TRIM16-4
XLOC_1176874
lnc-MPP7-8
lnc-C12orf66-2
lnc-ZNF827-1
lnc-MYB-13
lnc-ENDOU-1
lnc-AC027323.1-2
lnc-DDX54-1
lnc-NHSL1-2
lnc-ZNF585A-3
lnc-MAPK6-5
LINC00890
lnc-ACY1-2
lnc-TTC26-5
XLOC_1176618
OXCT1-AS1
lnc-KCNJ12-4
XLOC_1230118
lnc-PLD6-1
DSG2-AS1
lnc-SYNM-2
lnc-IL32-1
lnc-CYFIP1-3
lnc-C1orf124-1
lnc-OSBPL9-3
lnc-POLE4-6
lnc-PPM1D-1
lnc-AC018816.3.1-9
lnc-THBS4-1
FAM13A-AS1
lnc-TOR3A-1
lnc-MARCKS-5
lnc-KLHDC10-2
lnc-ZBED4-1
lnc-PMEL-1
lnc-C6orf195-14
lnc-BLCAP-1
lnc-FAM161B-2
lnc-TMEM85-1
XLOC_2217240
lnc-ZNF710-1
lnc-ITIH3-4
lnc-PCDH12-1
lnc-BEAN1-1
XLOC_932070
lnc-MUC20-10
lnc-C5orf35-1
lnc-KCNT1-2
lnc-TMEM38A-2
lnc-CNIH3-2
lnc-PHRF1-1
lnc-TAF1D-1
XLOC_1174686
lnc-C22orf26-1
GRTP1-AS1
lnc-C1orf112-3
XLOC_2840602
lnc-ST6GAL2-1
lnc-C9orf103-7
lnc-PPP1R3A-4
lnc-NPAT-2
lnc-RP11-181C3.1.1-9
XLOC_1624274
lnc-CROCC-2
lnc-CPM-2
lnc-TMEM156-1
lnc-SERPINE2-1
lnc-SPTBN2-3
lnc-IRF4-6
lnc-KIAA0564-2
C1RL-AS1
XLOC_1093604
lnc-FAM96B-3
LINC01146
lnc-SLC2A1-1
lnc-WDR27-1
lnc-ALX4-7
lnc-RAB3GAP2-1
lnc-GPR27-5
lnc-RP11-498D10.4.1-1
lnc-MAP1LC3B-9
lnc-AP4E1-1
lnc-ST7L-1
lnc-GPR137C-2
lnc-NR2C2-1
lnc-SLC36A1-5
XLOC_1176877
lnc-CRHR1-6
HOXA10-AS
lnc-GPRC5D-3
lnc-RIPK2-2
lnc-KCTD2-2
lnc-VN1R2-8
lnc-ALG3-1
lnc-TMC5-1
lnc-NDFIP2-13
lnc-KLHL20-1
lnc-ARRDC1-1
BIRC6-AS1
lnc-AGGF1-1
lnc-HABP4-4
DNAJC9-AS1
XLOC_378685
lnc-NPIPL2-3
lnc-GARS-2
SRGAP3-AS4
lnc-EXOC2-21
lnc-NDUFV1-6
lnc-OTUD6B-1
lnc-TCTEX1D1-1
XLOC_1177575
lnc-ZNF790-1
lnc-SETD5-1
lnc-INPPL1-1
lnc-KIAA1147-1
lnc-TIMM9-3
XLOC_006489
lnc-NDUFAF2-2
MIR100HG
lnc-GRM7-2
lnc-PNMA1-1
XLOC_2558435
lnc-PTPN2-6
lnc-WDR26-1
SATB1-AS1
lnc-FAM138A-3
lnc-SRPK2-7
XLOC_1093591
XLOC_2559906
lnc-ARL4C-2
lnc-SH2D7-3
lnc-PODXL-3
lnc-NGFR-1
lnc-CDK20-12
XLOC_1174280
XLOC_1547464
lnc-RAB23-2
XLOC_2712490
lnc-ZSCAN2-6
lnc-PEX3-1
lnc-THUMPD2-1
lnc-SFN-1
H1FX-AS1
lnc-SIVA1-1
XLOC_2217271
lnc-P4HA3-1
lnc-SPP1-1
lnc-C12orf66-1
lnc-ZNF83-7
lnc-C1QTNF5-1
lnc-MYL6-2
FOXP1-AS1
lnc-RP11-537P22.1.1-1
lnc-SPIN1-1
lnc-GLIPR1L1-2
LINC00943
lnc-SEMA5B-1
lnc-C1orf201-5
lnc-ZNF83-6
lnc-CYB5R2-5
lnc-NAA50-3
lnc-RP11-1105G2.3.1-3
XLOC_515896
lnc-SRPX2-2
lnc-DBNDD1-1
lnc-PSMG4-6
TCL6
lnc-GJA4-2
lnc-FUBP3-1
lnc-CHD2-3
ST8SIA6-AS1
lnc-GUSB-4
lnc-CPLX1-3
lnc-C6orf201-18
lnc-NUDT16-1
lnc-NDUFS6-17
lnc-RAI1-1
lnc-HMGB2-15
BOLA3-AS1
lnc-ZNF235-2
lnc-PLD3-3
XLOC_2220157
lnc-MUTYH-1
lnc-ABHD12B-4
IQCH-AS1
lnc-CHMP4C-1
lnc-CDC42SE1-1
lnc-CNOT7-1
LINC01606
lnc-EIF2C2-2
XLOC_1093877
lnc-NIPAL1-2
lnc-ZNF681-4
lnc-KDM4C-18
lnc-EHBP1-1
lnc-FLNB-3
lnc-SNX11-7
XLOC_514621
lnc-IARS2-2
XLOC_2837388
lnc-DENND2D-1
lnc-RNF139-2
lnc-CPLX1-2
lnc-FOXM1-1
lnc-ZFAT-6
lnc-VIPR1-1
lnc-KAT8-2
lnc-TOX4-1
lnc-MBTPS2-1
lnc-EBNA1BP2-1
XLOC_2840559
lnc-TSHZ3-2
lnc-NDUFB3-3
lnc-SMCR7-2
lnc-AC011551.1-1
XLOC_236009
lnc-RHBDD3-1
LINC00689
lnc-KIAA1919-8
lnc-GPR98-8
lnc-CS-1
lnc-C16orf61-1
MTUS2-AS2
lnc-NQO2-14
lnc-NDUFAB1-1
lnc-ZFC3H1-4
lnc-KHDRBS3-9
lnc-B4GALT7-1
lnc-RUNX1-4
lnc-PLA2G2D-1
lnc-ECHDC3-1
XLOC_2219057
lnc-MSI2-5
lnc-RPL19-6
lnc-SMG6-3
lnc-NBN-1
lnc-CXADR-1
lnc-C1orf43-4
lnc-GINS1-4
lnc-WDR83OS-1
lnc-IL17RA-13
MRVI1-AS1
lnc-C15orf48-1
lnc-NUB1-4
RRM1-AS1
lnc-IKBIP-1
lnc-MYO19-2
lnc-ARHGEF26-3
lnc-ASB5-1
lnc-DNASE1L1-1
lnc-ATF7IP2-1
lnc-FIGNL1-1
ALKBH3-AS1
lnc-PPP4R1L-1
lnc-C6orf146-3
XLOC_1828024
lnc-TBP-3
lnc-HAND1-3
XLOC_2839990
XLOC_1232275
XLOC_2031508
lnc-CCDC51-1
lnc-H3F3B-1
lnc-CAMKMT-1
lnc-PSME1-1
XLOC_2558202
lnc-ARL4D-1
lnc-C7orf45-1
lnc-SEC23A-3
TNRC6C-AS1
lnc-SRSF5-2
lnc-DALRD3-1
lnc-LEPROTL1-9
lnc-GCC1-1
lnc-ZSCAN21-1
lnc-FAM162A-2
TTC3-AS1
lnc-PRDM4-4
lnc-NBPF9-4
lnc-ARMC6-1
MIR205HG
lnc-FBXO34-5
XLOC_2840072
lnc-SGSM2-1
lnc-ATP5F1-2
lnc-C9orf3-6
lnc-LMTK3-1
lnc-PHB2-4
lnc-MAP1LC3B-1
lnc-ZNF44-1
lnc-PCK1-4
lnc-RP3-377D14.1.1-7
lnc-TMSB15A-5
lnc-LUZP1-3
lnc-AC007390.5.1-1
lnc-SWSAP1-1
lnc-NPHS2-3
lnc-DKK4-5
lnc-FAM207A-8
lnc-NAALADL2-8
lnc-C9orf43-1
lnc-TNFAIP3-5
lnc-VWDE-1
lnc-AC107021.1-9
lnc-SIRPG-1
lnc-ZC3H6-3
lnc-PFDN4-3
lnc-SHARPIN-2
lnc-STYX-2
lnc-SPRED2-11
lnc-VAC14-1
lnc-PRKAR1A-7
lnc-LALBA-1
XLOC_235741
lnc-TPCN2-1
lnc-EIF1AD-1
lnc-C1orf122-1
lnc-PTEN-12
lnc-MBTPS2-2
lnc-MAPK6-8
XLOC_1093878
lnc-ARHGAP17-9
lnc-WDR73-9
lnc-REST-4
lnc-C1S-1
lnc-GK-3
lnc-VCL-2
lnc-CD226-5
MYCBP2-AS1
XLOC_753555
XLOC_1623377
lnc-DHX38-4
lnc-ASPRV1-2
XLOC_2557495
lnc-HPGD-2
lnc-STON1-1
lnc-MRPS24-2
lnc-TMEM240-1
lnc-TMEM147-1
lnc-ZNF583-5
XLOC_378454
lnc-NNT-3
lnc-ZNF30-1
lnc-HCN4-2
XLOC_1175427
TMEM161B-AS1
lnc-C8orf48-7
lnc-C6orf164-2
lnc-NEURL2-1
lnc-ARPC4-3
lnc-KIAA0020-2
lnc-CHRAC1-7
lnc-ARHGAP28-7
lnc-SLC5A2-3
lnc-NECAB1-2
lnc-C17orf80-6
lnc-MRPL39-20
XLOC_1013595
lnc-C2CD4A-9
XLOC_2712228
lnc-SEPT7L-2
lnc-DUSP14-5
lnc-RABL2A-5
lnc-GLUD1-2
lnc-MYLPF-3
lnc-C6orf112-8
XLOC_000029
lnc-C8orf42-4
lnc-MKI67IP-8
lnc-PTPN6-1
EAF1-AS1
lnc-ZNF101-4
lnc-TMEM116-1
lnc-CLDN15-2
lnc-RPS24-3
lnc-SCARB2-1
lnc-ANKRD27-6
LINC00466
lnc-TULP4-1
lnc-YPEL5-1
XLOC_1621640
lnc-OR4F16-8
lnc-LETM2-2
XLOC_1231971
DLGAP4-AS1
ZNF793-AS1
lnc-IRS2-8
lnc-TATDN1-2
lnc-WNT8A-2
lnc-TOP1MT-5
lnc-SLC25A47-5
lnc-HHIPL1-2
TRG-AS1
lnc-AL033381.1-8
lnc-OXNAD1-6
lnc-RFC2-5
lnc-LY86-4
lnc-SGCG-11
lnc-ZBTB25-5
lnc-TCTA-1
lnc-KCNS3-11
lnc-TNNT1-1
lnc-SLC22A23-1
lnc-IGFN1-5
ARHGEF19-AS1
lnc-NDUFB9-1
lnc-SMG1-2
lnc-GTF2E2-2
lnc-DISC1-1
XLOC_2834725
lnc-ARHGAP26-4
lnc-CEMP1-5
XLOC_930843
XLOC_753809
lnc-C2orf89-2
lnc-CLDN6-4
lnc-NOTCH2-2
TH2LCRR
lnc-ATPAF2-2
XLOC_2217825
lnc-CSNK1A1-1
lnc-LYRM2-2
lnc-CTD-2368P22.1.1-2
BZRAP1-AS1
lnc-EFCAB5-2
XLOC_753260
lnc-AC020907.3-2
lnc-CKS1B-2
lnc-EPN1-6
XLOC_1622314
lnc-PUS7-2
lnc-NDUFS6-16
lnc-PPDPF-3
lnc-PLXND1-2
lnc-C7orf10-4
XLOC_1830341
lnc-RPL24-1
lnc-GNA11-3
lnc-ANKRD50-3
lnc-AMELY-10
lnc-PRKAB2-1
lnc-C17orf97-5
XLOC_1174749
lnc-RASAL2-3
lnc-C6orf52-1
lnc-PPP2R3C-4
lnc-PDE8A-2
XLOC_2712799
XLOC_2557962
lnc-ZNF791-10
lnc-RIMBP3C-3
lnc-DNAH5-4
lnc-RP11-116D17.1.1-4
lnc-CAPN2-2
lnc-PCGF2-3
lnc-TUBA1C-1
XLOC_1233735
lnc-UTY-1
XLOC_1830773
lnc-UBE2N-1
lnc-MACC1-1
lnc-SLC30A4-2
lnc-FAM178A-1
lnc-EFEMP1-8
XLOC_1015300
XLOC_517115
lnc-TREX1-2
lnc-BRD7-3
lnc-SOX15-4
XLOC_2558569
lnc-SCGB2B2-7
lnc-CLUAP1-2
lnc-DTHD1-5
lnc-DR1-1
lnc-NR2F2-7
lnc-FBXO45-3
lnc-DUOX2-1
lnc-COQ9-1
lnc-SPTBN5-1
LINC01535
lnc-RD3-5
XLOC_2030363
lnc-NTSR2-6
lnc-AL391421.1-2
lnc-C7orf71-4
lnc-RP11-173D9.3.1-3
lnc-ZC3H12B-12
lnc-ABCA5-7
lnc-MNT-1
lnc-FAM177A1-1
lnc-ATM-2
XLOC_1230810
lnc-AC087491.2.1-1
lnc-NCOA3-9
lnc-SGSH-1
lnc-BASP1-1
lnc-AP3S1-9
lnc-RGS20-1
lnc-ARF6-1
lnc-S100A13-2
lnc-KIAA0087-2
lnc-MTBP-4
lnc-FAM135A-3
lnc-ARID5A-2
XLOC_004358
XLOC_1622112
lnc-CDCP2-1
lnc-ZNF682-3
lnc-NEMF-1
lnc-ATG13-1
lnc-FBXO11-1
lnc-BASP1-6
LINC00959
XLOC_931668
B3GALT5-AS1
lnc-S100A7A-1
lnc-ATP1B3-2
PLCE1-AS2
lnc-SENP6-12
lnc-STARD9-1
lnc-MRPS16-1
lnc-NAB2-2
lnc-C9orf3-5
lnc-MORC2-5
lnc-VSTM2B-9
XLOC_2838591
lnc-KDM3A-1
XLOC_2396188
lnc-TSSK6-1
ZRANB2-AS2
lnc-G3BP2-1
lnc-SMAD4-2
lnc-C14orf23-2
lnc-FAM55B-1
lnc-FBXW8-2
lnc-SHB-1
lnc-VMAC-1
lnc-C1QL3-1
lnc-PRR15L-2
XLOC_1829856
lnc-NKX2-5-2
lnc-CAPN13-1
lnc-IFNG-3
lnc-ZNF460-2
lnc-CHSY1-5
lnc-TBL1XR1-6
lnc-MBD3L1-2
lnc-WDSUB1-3
lnc-TAS2R42-1
lnc-ZNF823-2
lnc-DUXA-3
lnc-FBXL3-1
lnc-RBM10-1
lnc-ARL16-1
lnc-C5orf45-1
lnc-CRBN-1
lnc-C20orf72-3
XLOC_1015137
STARD4-AS1
lnc-NBAS-15
lnc-SLC1A1-6
lnc-CPM-3
lnc-SETDB1-1
lnc-RP11-582J16.5.1-4
lnc-GLDN-2
lnc-C9orf50-2
lnc-ZNF791-3
lnc-TLCD1-3
lnc-VPS13D-1
lnc-CCDC127-2
lnc-IL12RB1-2
lnc-PLAC8L1-1
lnc-PPP4R1-18
lnc-ACVR2B-1
lnc-MGLL-5
lnc-UPB1-2
XLOC_1585018
lnc-COG3-2
lnc-VAT1-1
lnc-C1orf85-1
lnc-PCK1-2
lnc-RIIAD1-3
lnc-KMO-1
lnc-ABHD12B-1
lnc-ARF1-1
lnc-AHSA2-5
lnc-SRPRB-1
lnc-COG8-1
lnc-KNTC1-3
lnc-RP3-486B10.1.1-4
lnc-FICD-2
lnc-ANAPC11-4
lnc-KCNC1-2
lnc-SYT15-3
lnc-ATG5-3
XLOC_933800
lnc-GIT2-1
lnc-MTERF-8
lnc-SCN2A-8
lnc-SLC16A3-1
lnc-CYFIP1-5
lnc-RWDD3-1
lnc-SIK2-1
XLOC_235729
lnc-DALRD3-2
lnc-CYB561-5
LINC01550
XLOC_378168
lnc-HKR1-3
lnc-FAAH2-6
lnc-CLASP2-1
lnc-FSIP1-1
lnc-MPHOSPH8-4
lnc-SBDS-4
lnc-GMDS-1
HOXC-AS3
lnc-TMSB15A-3
lnc-ATL1-2
lnc-ZNF397-2
lnc-LRR1-1
ZNF561-AS1
lnc-DUPD1-2
lnc-AMFR-2
lnc-PLEKHH1-1
XLOC_1230085
lnc-ACP1-3
lnc-RP11-210M15.2.1-6
lnc-TRAP1-1
lnc-CACNA2D3-2
lnc-RLIM-8
WDFY3-AS2
lnc-CSNK1G2-4
lnc-CHRNA5-3
lnc-BARHL2-4
XLOC_2835382
XLOC_2712257
lnc-MST1P9-3
lnc-CHADL-1
SNAP25-AS1
lnc-ULBP3-5
TMEM9B-AS1
SPAG5-AS1
SUCLA2-AS1
lnc-NCEH1-1
lnc-SERPINB6-1
lnc-MBOAT1-13
XLOC_1228939
lnc-NEDD1-8
RAD51-AS1
XLOC_1175771
XLOC_2396935
lnc-EXOSC6-2
XLOC_1232513
lnc-GNRHR2-1
lnc-PTPRZ1-5
lnc-ZNF804B-2
lnc-CCDC70-2
lnc-NCKAP1-1
XLOC_933618
lnc-RHOC-1
lnc-C11orf1-1
lnc-CXorf58-2
lnc-POTEF-4
lnc-LGSN-6
XLOC_847150
lnc-MRPS25-5
lnc-FAM25A-3
lnc-AC115618.1-1
lnc-AFM-3
lnc-MFSD8-1
lnc-TMEM150A-3
lnc-NSMCE1-1
lnc-KLHL22-2
lnc-TMEM234-1
XLOC_2219986
lnc-RP11-930P14.1.1-1
lnc-ILK-1
lnc-PRDM13-2
lnc-SDF2-1
lnc-SH2D3A-2
lnc-DHX15-1
lnc-FPR2-1
lnc-TASP1-10
lnc-CCDC7-2
lnc-HELZ-2
lnc-KRT80-9
lnc-AC011239.1.1-6
lnc-FBXO2-1
lnc-PPIAL4G-8
lnc-IL23A-2
lnc-TSN-4
lnc-LECT1-1
lnc-SSBP4-2
lnc-PPP1R3G-3
lnc-GCGR-1
lnc-MTMR2-1
lnc-C19orf44-5
XLOC_1547746
lnc-PRMT8-6
lnc-YY1-1
lnc-MRC2-1
lnc-ATP1A3-1
lnc-DDX51-2
LINC00526
lnc-TSKS-1
lnc-SUSD5-1
lnc-MCTS1-2
lnc-TP53I11-6
lnc-TMEM132B-9
lnc-RGS18-6
lnc-KRBA1-2
lnc-TMUB2-2
lnc-CAB39L-4
lnc-LOH12CR1-5
lnc-AGPS-3
lnc-USP8-1
lnc-USPL1-2
lnc-L3MBTL2-1
lnc-ATP6V1E2-5
lnc-SRGAP3-2
ZMYM4-AS1
lnc-AC114947.1.1-1
lnc-TMPRSS2-1
lnc-CCM2-2
lnc-KIAA0125-2
lnc-TMEM126B-4
lnc-XPOT-4
lnc-RP11-6F2.7.1-5
lnc-AC087289.1-1
lnc-DUSP14-4
DANT1
lnc-CDR2-1
XLOC_2217124
XLOC_1174819
XLOC_1174715
lnc-BTG2-3
lnc-GPR101-3
lnc-TOR1AIP1-1
lnc-ZNF177-1
lnc-SALL1-6
lnc-UBL5-7
lnc-TBPL1-3
lnc-CTU2-2
lnc-SMARCC2-3
lnc-C6orf201-11
lnc-APEX1-2
lnc-GNG13-5
XLOC_514590
lnc-TRMT61B-1
lnc-PFKP-16
lnc-ZNF804B-1
XLOC_2393336
DIO3OS
lnc-MRPL40-4
lnc-JUNB-2
lnc-MAFF-2
lnc-NKX3-1-2
lnc-NSA2-3
lnc-BPHL-9
lnc-ALPK1-2
lnc-BTD-1
lnc-HRASLS-2
XLOC_2837223
lnc-RSPH1-3
lnc-TCF7-4
lnc-UBFD1-1
lnc-CTRL-2
XLOC_006446
XLOC_1548111
lnc-LAMA5-4
lnc-GDI2-1
lnc-CDIPT-1
lnc-ALDH1A2-3
LINC01270
lnc-WDR34-2
FARSA-AS1
lnc-SPINT2-5
lnc-C10orf103-1
lnc-KLHL25-12
lnc-C6orf105-5
lnc-AC084851.1-9
lnc-SCNN1B-1
lnc-ARVCF-4
lnc-BMP8A-2
lnc-MYC-3
lnc-LRRC61-5
XLOC_2559576
lnc-DOC2B-3
lnc-TLE3-8
lnc-PPFIA3-2
XLOC_1016089
lnc-GDPD4-2
lnc-SOD3-1
lnc-C19orf71-3
lnc-ETNK1-3
XLOC_2559125
lnc-NME4-1
lnc-S1PR1-2
lnc-PFKFB2-2
XLOC_2032021
lnc-TIGD6-1
lnc-BTBD6-1
lnc-AL901608.1-17
XLOC_2835377
LINC00390
lnc-RIC8A-2
lnc-ENTPD5-5
lnc-USP28-5
lnc-SLC23A1-1
lnc-RP11-404P21.6.1-9
lnc-ABCC4-1
lnc-C19orf10-1
lnc-BMS1-12
lnc-SCNN1G-1
lnc-MINA-9
lnc-KCTD18-1
lnc-FAM127C-1
lnc-PYCARD-1
lnc-SRPK2-5
XLOC_1175053
XLOC_376248
LIPE-AS1
lnc-SPTBN4-3
lnc-ADAMTS18-3
lnc-ABHD4-1
lnc-PPP2R5B-4
XLOC_2393438
lnc-XRN2-10
lnc-MARCH10-4
lnc-SEMA5A-10
lnc-ZNF862-1
PCF11-AS1
lnc-CIB3-1
lnc-NXPH2-3
lnc-GATM-5
lnc-SOX15-1
lnc-MRPS27-10
lnc-YIF1A-1
XLOC_2713162
lnc-TRPV2-5
lnc-WDPCP-2
lnc-ZFP62-1
lnc-MLX-3
lnc-CD80-2
lnc-PDCD4-1
lnc-MRPL9-2
lnc-ZXDA-1
lnc-ITPR2-2
lnc-PPIC-6
lnc-NNT-5
lnc-C6orf99-7
lnc-LYRM2-1
XLOC_2836993
lnc-FSCN2-3
lnc-PIGG-2
lnc-RP11-796G6.2.1-3
lnc-SRA1-3
lnc-LYZL1-10
XLOC_1230773
lnc-GMDS-6
LINC00620
lnc-RP11-404L6.2.1-4
lnc-SLFN12-1
lnc-CIB1-3
EIF1B-AS1
lnc-MEP1B-2
lnc-KHDRBS3-6
XLOC_1232166
lnc-HLA-DMA-1
lnc-OR4F16-3
XLOC_2393128
lnc-CLRN2-1
XLOC_1624910
lnc-TNP1-6
lnc-PRR15L-6
ZBTB20-AS1
lnc-KIF26B-4
lnc-EVI5L-3
lnc-TAF13-2
LINC00847
lnc-TTC23-5
lnc-PANK3-13
lnc-XRCC6-1
lnc-SCRN1-2
lnc-GPR126-1
TCEB3-AS1
lnc-SLCO2B1-3
lnc-CTD-2215E18.1.1-7
lnc-PAPLN-1
lnc-BRCA1-3
LINC00649
XLOC_1623520
lnc-C19orf6-5
lnc-TCHP-1
lnc-ECHDC2-1
lnc-BDH1-5
lnc-TMEM161B-4
XLOC_1014170
TMEM246-AS1
lnc-CLMP-8
lnc-PSMG4-11
SIAH2-AS1
lnc-PXDC1-12
lnc-LEKR1-1
lnc-TRIM69-1
lnc-ANKRD20A2-14
lnc-RGS20-3
lnc-OLR1-3
lnc-BMS1-10
lnc-FGF21-2
KDM4A-AS1
lnc-AC006455.1-12
lnc-FLII-1
lnc-WNT9A-3
lnc-RPF1-1
LINC00431
lnc-LAMA5-2
lnc-MMP23B-1
ZNF571-AS1
lnc-MDH2-2
lnc-TNFRSF1A-3
lnc-ERICH1-9
lnc-AIDA-2
lnc-CCNYL2-9
lnc-AC010872.2.1-2
lnc-ZAP70-1
lnc-TMSB15A-6
lnc-SAP30-2
lnc-ZFP42-2
GMDS-AS1
lnc-ZNF680-14
lnc-ZNF552-2
lnc-FRMD1-8
lnc-HOXA13-1
lnc-C19orf26-2
lnc-TWIST1-1
XLOC_237626
lnc-POTEM-4
lnc-MLNR-1
lnc-SERAC1-3
lnc-RHOA-1
lnc-UBAP1-5
SRRM2-AS1
lnc-C2orf84-1
lnc-MTERF-7
lnc-THRB-3
lnc-HIP1R-1
lnc-ZCCHC17-7
lnc-FMO5-1
lnc-CLLU1.1-1
lnc-SPG11-3
lnc-SESN3-3
lnc-ARL6IP5-1
lnc-MTO1-1
lnc-IFT46-1
XLOC_1231041
lnc-TIGD1-1
lnc-CDH18-7
lnc-ATPIF1-2
lnc-RNF213-1
lnc-SBF2-1
lnc-SNN-5
lnc-SLC7A7-2
lnc-NMU-4
lnc-CXCL16-1
lnc-SURF1-1
lnc-ARID2-11
lnc-SLAMF9-2
lnc-ZNF732-4
lnc-PADI1-1
TRIM52-AS1
LUCAT1
lnc-OR6S1-1
lnc-AL901608.1-3
lnc-SAFB-1
XLOC_931842
lnc-PIGY-5
lnc-KCNJ12-5
lnc-C2orf40-8
XLOC_847013
lnc-AQP8-1
lnc-PPIF-1
lnc-ZNF724P-2
NKILA
RNF185-AS1
lnc-PCCA-2
lnc-PRSS27-2
lnc-SCLT1-4
LINC00237
lnc-HPDL-1
lnc-VPS36-2
lnc-PUS10-4
XLOC_2028133
lnc-HSPA12B-1
lnc-SETD6-1
lnc-CCDC23-1
lnc-SCGB1D4-1
lnc-SPATA9-1
lnc-MSMP-2
lnc-PIGN-1
XLOC_1830759
lnc-PEAK1.1-2
LINC01297
lnc-CPSF4-1
lnc-C19orf6-3
lnc-ARMC7-1
lnc-NRIP2-2
lnc-CCNE2-1
lnc-HSD17B1-2
XLOC_1483768
XLOC_2558461
lnc-EPHB6-1
lnc-DKK3-1
lnc-DHRS7B-3
lnc-WNT1-2
lnc-AL049840.1-1
lnc-YIF1B-1
lnc-ZSCAN2-5
PPP3CB-AS1
lnc-ZNF131-10
lnc-CHRNA4-4
lnc-AC040934.1-3
XLOC_932037
lnc-NFATC3-1
lnc-TMBIM1-3
lnc-RADIL-1
lnc-AMDHD1-4
lnc-DONSON-1
lnc-SP110-8
lnc-THBS4-6
lnc-FAM161B-1
TESC-AS1
lnc-C3orf23-2
lnc-COL8A2-3
lnc-PCDH1-5
lnc-SLC39A10-10
GLTSCR2-AS1
lnc-BOD1-1
XLOC_2839036
lnc-NMBR-2
lnc-FAM78A-3
MCM3AP-AS1
lnc-ZBTB37-2
lnc-AL033381.1-4
lnc-CDK12-1
CCDC144NL-AS1
lnc-CRHR1-7
lnc-NLRP12-2
lnc-RIC8A-1
lnc-ZXDB-3
XLOC_2837916
lnc-NME6-2
lnc-LRRFIP2-3
lnc-RP11-10A14.4.1-1
lnc-ZCCHC24-7
lnc-C10orf28-5
lnc-LRRC3C-2
lnc-MST1-2
lnc-FOXA3-1
lnc-C1orf123-1
lnc-RTN4IP1-2
lnc-ADAM22-2
lnc-PRR15L-3
lnc-RHBDF1-1
lnc-MTR-1
lnc-MAN2A2-2
lnc-HMGA1-2
lnc-CTC-203F4.1.1-3
lnc-RP11-279O9.4.1-1
lnc-PRR20A-5
lnc-RNF135-1
XLOC_754515
lnc-SLC25A31-2
lnc-ADCK3-1
lnc-CCT6B-4
lnc-GDE1-2
lnc-OST4-5
lnc-WDR60-11
TRAF3IP2-AS1
lnc-FREM3-2
XLOC_846032
lnc-ITGB3BP-5
XLOC_000127
lnc-SLMO1-1
lnc-RALB-8
XLOC_2835380
lnc-VCAN-1
lnc-UCK1-3
lnc-TYMS-1
lnc-C7orf23-2
lnc-CPVL-4
lnc-ATG12-5
lnc-HDLBP-1
lnc-C12orf63-3
lnc-DPP4-2
XLOC_1621861
lnc-ARHGAP11B-8
lnc-SDCCAG8-1
XLOC_2835378
lnc-FBXL22-1
FAM95B1
ZBED5-AS1
lnc-FAM110B-12
lnc-EDC3-3
lnc-FAM59B-3
lnc-PANK1-6
lnc-FAM135A-2
lnc-FAM196A-1
lnc-RRP8-1
XLOC_004281
lnc-NMNAT1-3
lnc-AP3S1-6
lnc-TRAPPC2L-1
lnc-C15orf41-11
lnc-GPR37L1-2
lnc-IL37-4
XLOC_2396781
FLNB-AS1
lnc-TMEM234-4
lnc-C16orf62-1
lnc-PRR15-4
XLOC_1623407
XLOC_1546890
LINC01016
lnc-KIF26A-1
lnc-JMJD7-PLA2G4B-2
lnc-PDE4D-1
lnc-BIRC8-3
lnc-PARN-14
lnc-ZNF814-1
lnc-GOLPH3L-1
XLOC_2030250
lnc-ERH-1
lnc-MYOM1-1
lnc-RBM26-1
lnc-IL6-8
lnc-C5orf27-4
lnc-RP11-1012A1.4.1-2
lnc-GYG2P1-1
lnc-CELF3-2
lnc-FBXO47-1
lnc-SYT13-2
lnc-PER2-5
XLOC_2712832
XLOC_000090
lnc-BHMT2-4
lnc-FKBP8-1
lnc-AE000662.92.1-10
lnc-ZNF181-2
lnc-C5orf63-2
XLOC_001976
LINC01039
lnc-LAD1-1
DCTN1-AS1
lnc-ILK-6
lnc-ZNF639-1
VIPR1-AS1
lnc-HAUS1-1
XLOC_845107
GCC2-AS1
lnc-M6PR-5
lnc-CMBL-5
lnc-RNF125-2
lnc-ATG10-6
lnc-ARHGEF38-1
lnc-SCML4-1
lnc-KLHL36-2
lnc-ZNF394-2
lnc-MPPE1-3
lnc-NRIP2-1
lnc-FREM3-6
lnc-ZNF382-2
GTF3C2-AS1
XLOC_2839861
lnc-DEGS2-6
XLOC_2394367
lnc-ZFAND1-1
UGDH-AS1
lnc-NIT2-1
lnc-PDAP1-1
lnc-NTAN1-1
lnc-HMBOX1-2
lnc-TLE2-1
lnc-BLK-2
lnc-UBE2Z-1
XLOC_2394807
lnc-GTPBP1-2
lnc-C5orf39-1
lnc-SNX33-2
lnc-CD47-7
MME-AS1
lnc-WBSCR22-4
lnc-TCIRG1-1
lnc-HBG2-1
XLOC_002503
lnc-TNNC2-1
lnc-APITD1-CORT-1
lnc-PMM2-6
lnc-CCDC43-5
lnc-CD2BP2-1
MEG3
lnc-SNX33-1
lnc-TOR1AIP2-5
lnc-UTP11L-3
lnc-SMARCC2-4
lnc-C1orf167-2
lnc-OSBPL7-1
lnc-LRIT2-4
lnc-WIBG-1
lnc-C12orf60-2
lnc-SCAND1-5
lnc-SLCO2B1-2
lnc-LRRC57-2
lnc-TUBB2A-1
XLOC_2712801
lnc-TMEM43-1
lnc-TGM6-4
XLOC_846295
lnc-NIPBL-1
lnc-ERV3-1-2
lnc-C6orf146-4
lnc-TARBP2-5
lnc-C11orf41-1
lnc-SRSF2-1
lnc-MRPL48-1
lnc-C15orf44-1
lnc-GRIA3-5
lnc-RPL30-1
XLOC_1176816
lnc-GRID2IP-1
LINC01359
lnc-CDK1-3
XLOC_006773
XLOC_005944
lnc-FBN1-3
SEMA3F-AS1
lnc-MAFF-6
lnc-C2orf78-3
XLOC_003475
lnc-TCP10L-3
lnc-FAM8A1-2
lnc-AC092295.7.1-2
lnc-SBF2-4
lnc-PRL-13
lnc-USP40-2
lnc-UBE2K-5
lnc-DNAJA1-2
lnc-RFPL4B-1
lnc-CD37-1
LINC00710
lnc-TAGLN-2
lnc-DUXA-1
LINC00475
lnc-DCAF6-1
lnc-OBSCN-3
NAPA-AS1
lnc-GMPR2-1
XLOC_2714659
XLOC_1829151
XLOC_1585364
lnc-CCDC159-4
lnc-CDYL2-6
XLOC_1015575
lnc-SEMA4B-2
lnc-EVX1-15
lnc-KIF13B-2
lnc-AC040934.1-1
lnc-FAM65A-1
lnc-PGBD5-1
lnc-C8orf22-13
lnc-RNF166-1
lnc-ZNF433-1
CBR3-AS1
CARS-AS1
lnc-ZNF391-1
lnc-ASH2L-1
LINC-PINT
lnc-RPS6-3
PTOV1-AS2
lnc-ABAT-3
lnc-C19orf80-1
lnc-ERAP1-1
lnc-GJA4-1
lnc-C20orf96-3
PRKAR2A-AS1
lnc-CACNG1-1
lnc-EEF1B2-1
lnc-BCAP31-1
lnc-CCDC85C-2
lnc-HSPB1-3
lnc-MDS2-1
lnc-TAF9-7
lnc-TPSG1-1
lnc-PURG-1
lnc-PLCG1-1
lnc-DHX36-3
lnc-GRHL2-14
lnc-FEZ1-2
lnc-ZBTB4-3
DLG5-AS1
ADIRF-AS1
lnc-SHANK2-5
lnc-SPPL3.1-3
lnc-MLLT10-5
lnc-UMODL1-5
XLOC_1176926
XLOC_375823
lnc-RTN3-1
lnc-BRAT1-2
lnc-AMN-3
lnc-REM2-2
lnc-PRR11-1
lnc-USP47-2
XLOC_934016
XLOC_1547462
XLOC_1175315
lnc-URB2-1
XLOC_2711915
lnc-SLC3A2-1
LINC00842
lnc-RNF24-1
lnc-GDPD4-1
lnc-COL4A4-2
lnc-IKZF1-2
lnc-ESCO2-1
lnc-ADAM21-4
lnc-TK2-2
lnc-PPIAL4G-5
lnc-NAA60-1
[truncated: 366 more rows]
