# Supplementary material for: The Role of Long Noncoding RNAs on Male Infertility: A Systematic Review and In Silico Analysis
Source: Biology (Basel). 2022 Oct 15;11(10):1510. doi: 10.3390/biology11101510 (PMC9598197; doi:10.3390/biology11101510)
Supplement: Supplementary file 1 [file biology-11-01510-s001.zip › Supplementary Table S7.xlsx]

## Sheet: Teratozoospermia
Identification of male infertility-related long non-coding RNAs and their functions based on a competing endogenous RNA network (Zhou & Wang, 2020) [45]
lncRNA	miRNAs
C7orf69	miR-1297
LINC00266-1	miR-140-5p, miR-876-3p, miR-1244, miR-217, miR-24-3p, miR-363-3p, miR-1297, miR-27a-3p
LINC00467	miR-27a-3p, miR-107
ADARB2-AS1	miR-216b-5p, miR-24-3p, miR-27a-3p, miR-107, miR-125a-5p, miR-125b-5p, miR-455-5p
AP000525	miR-139-5p, miR-140-5p, miR-876-3p, miR-1244, miR-142-3p, miR-17-5p, miR-20b-5p, miR-761, miR-3619-5p, miR-216b-5p, miR-1297, miR-425-5p, miR-125a-5p, miR-125b-5p, miR-129-5p, miR-490-3p
AC008088	miR-507, miR-193a-3p, miR-129-5p
HLA-F-AS1	miR-507, miR-137, miR-17-5p, miR-20b-5p, miR-193a-3p, miR-761, miR-3619-5p, miR-217, miR-22-3p, miR-23b-3p, miR-24-3p, miR-363-3p, miR-27a-3p, miR-107, miR-425-5p, miR-455-5p, miR-129-5p
COX10-AS1	miR-140-5p, miR-876-3p, miR-1244, miR-142-3p, miR-17-5p, miR-20b-5p, miR-206, miR-761, miR-3619-5p, miR-22-3p, miR-363-3p, miR-10a-5p
EPB41L4A-AS1	miR-139-5p, miR-17-5p, miR-20b-5p, miR-429, miR-761, miR-3619-5p, miR-217, miR-22-3p, miR-23b-3p, miR-425-5p, miR-129-5p
LINC00466	miR-507, miR-137, miR-206, miR-429, miR-761, miR-3619-5p, miR-216b-5p, miR-22-3p, miR-23b-3p, miR-24-3p, miR-363-3p, miR-27a-3p, miR-33a-3p, miR-129-5p, miR-490-3p
PRICKLE2-AS3	miR-137, miR-140-5p, miR-876-3p, miR-1244, miR-206, miR-761, miR-3619-5p, miR-23b-3p, miR-24-3p, miR-363-3p, miR-125a-5p, miR-125b-5p, miR-490-3p
ST7-AS2	miR-137, miR-139-5p, miR-206, miR-429, miR-216b-5p, miR-22-3p, miR-23b-3p, miR-27a-3p, miR-425-5p, miR-125a-5p, miR-125b-5p, miR-129-5p
C12orf77	miR-507, miR-137, miR-17-5p, miR-20b-5p, miR-193a-3p, miR-206, miR-761, miR-3619-5p, miR-216b-5p, miR-24-3p, miR-1297
AL022344	miR-137, miR-1297
LINC00276	miR-137, miR-206, miR-429, miR-761, miR-3619-5p, miR-216b-5p, miR-23b-3p, miR-363-3p, miR-27a-3p, miR-425-5p, miR-129-5p, miR-490-3p
LINC00347	miR-139-5p, miR-206, miR-22-3p, miR-363-3p, miR-425-5p
PRMT5-AS1	miR-139-5p, miR-217, miR-24-3p, miR-107, miR-125a-5p, miR-125b-5p, miR-129-5p
AC092620	miR-193a-3p, miR-107, miR-455-5p
IGSF11-AS1	miR-206, miR-429, miR-217, miR-27a-3p, miR-129-5p, miR-490-3p
ZBTB20-AS1	miR-301b-3p, miR-212-3p, miR-206, miR-761, miR-3619-5p, miR-217, miR-24-3p, miR-1297, miR-27a-3p, miR-129-5p
ARHGEF26-AS1	miR-139-5p, miR-17-5p, miR-20b-5p, miR-761, miR-3619-5p, miR-217, miR-23b-3p, miR-363-3p, miR-27a-3p, miR-107, miR-425-5p, miR-125a-5p, miR-125b-5p, miR-10a-5p, miR-455-5p, miR-490-3p
FAM13A-AS1	miR-507, miR-137, miR-139-5p, miR-142-3p, miR-17-5p, miR-20b-5p, miR-217, miR-22-3p, miR-23b-3p, miR-24-3p, miR-363-3p, miR-107, miR-125a-5p, miR-125b-5p, miR-455-5p, miR-129-5p
SLIT2-IT1	miR-139-5p, miR-33a-3p
MALAT1	miR-507, miR-140-5p, miR-876-3p, miR-1244, miR-142-3p, miR-17-5p, miR-20b-5p, miR-193a-3p, miR-206, miR-429, miR-761, miR-3619-5p, miR-216b-5p, miR-217, miR-22-3p, miR-23b-3p, miR-24-3p, miR-363-3p, miR-1297, miR-425-5p, miR-125a-5p, miR-125b-5p, miR-455-5p, miR-129-5p, miR-490-3p
LZTS1-AS1	miR-212-3p, miR-22-3p, miR-24-3p, miR-33a-3p, miR-129-5p
FAM181A-AS1	miR-507, miR-193a-3p, miR-206, miR-761, miR-3619-5p, miR-216b-5p, miR-23b-3p, miR-1297, miR-33a-3p, miR-455-5p, miR-129-5p

## Sheet: NOA
Exploring the dysregulated mRNAs–miRNAs–lncRNAs interactions associated to idiopathic non-obstructive azoospermia (Sabetian et al., 2022) [33]
LncRNAs	miRNAs	Target Genes
FAM230B	miR-27b-3p, miR-509-3-5p	CRISP2 (miR-27b-3p), PLK1 (miR-509-3-5p)
FER1L6-AS2	miR-27b-3p, miR-509-3-5p	CRISP2 (miR-27b-3p), PLK1 (miR-509-3-5p)
LINC00238	miR-27b-3p, miR-509-3-5p	CRISP2 (miR-27b-3p), PLK1 (miR-509-3-5p)
LINC00301	miR-27b-3p, miR-509-3-5p	CRISP2 (miR-27b-3p), PLK1 (miR-509-3-5p)
LINC00643	miR-27b-3p, miR-509-3-5p	CRISP2 (miR-27b-3p), PLK1 (miR-509-3-5p)
LINC00654	miR-27b-3p, miR-509-3-5p	CRISP2 (miR-27b-3p), PLK1 (miR-509-3-5p)
LINC00661	miR-27b-3p, miR-509-3-5p	CRISP2 (miR-27b-3p), PLK1 (miR-509-3-5p)
LINC00905	miR-27b-3p, miR-509-3-5p	CRISP2 (miR-27b-3p), PLK1 (miR-509-3-5p)
MORC2-AS1	miR-27b-3p, miR-509-3-5p	CRISP2 (miR-27b-3p), PLK1 (miR-509-3-5p)

## Sheet: Asthenozoospermia
RNA-sequencing and bioinformatics analysis of long noncoding RNAs and mRNAs in the asthenozoospermia (Lu et al., 2020) [41]
lncRNAs	Genes	Gene name	Counts	listTotal	popHits	popTotal	foldEnrichment	hyper P Value	miRNAs
LINC00893	ENSG00000162522	KIAA1522	2	2	29	277	9.55172	0.010621	hsa-miR-125b-5p,hsa-miR-125a-5p
LINC00893	ENSG00000140332	TLE3	2	2	10	277	27.7	0.00117721	hsa-miR-125b-5p,hsa-miR-125a-5p
LINC00893	ENSG00000167565	SERTAD3	2	2	14	277	19.7857	0.00238058	hsa-miR-125b-5p,hsa-miR-125a-5p
LINC00893	ENSG00000136802	LRRC8A	2	2	18	277	15.3889	0.00400251	hsa-miR-125b-5p,hsa-miR-125a-5p
LINC00893	ENSG00000011009	LYPLA2	2	2	13	277	21.3077	0.0020405	hsa-miR-125b-5p,hsa-miR-125a-5p
LINC00893	ENSG00000107341	UBE2R2	2	2	42	277	6.59524	0.0225239	hsa-miR-125b-5p,hsa-miR-125a-5p
AC005034.3	ENSG00000186684	CYP27C1	1	1	2	277	138.5	0.00722022	hsa-miR-203a-3p
AC005034.3	ENSG00000139433	GLTP	1	1	7	277	39.5714	0.0252708	hsa-miR-203a-3p
COX10-AS1	ENSG00000100479	POLE2	1	1	1	277	277	0.00361011	hsa-miR-361-5p
COX10-AS1	ENSG00000163743	RCHY1	1	1	11	277	25.1818	0.0397112	hsa-miR-361-5p
COX10-AS1	ENSG00000122417	ODF2L	1	1	1	277	277	0.00361011	hsa-miR-361-5p
COX10-AS1	ENSG00000079950	STX7	1	1	10	277	27.7	0.0361011	hsa-miR-361-5p
MIR497HG	ENSG00000198894	CIPC	1	1	11	277	25.1818	0.0397112	hsa-miR-128-3p
MIR497HG	ENSG00000164379	FOXQ1	1	1	13	277	21.3077	0.0469314	hsa-miR-128-3p
MIR497HG	ENSG00000105464	GRIN2D	1	1	6	277	46.1667	0.0216606	hsa-miR-128-3p
MIR497HG	ENSG00000131446	MGAT1	1	1	3	277	92.3333	0.0108303	hsa-miR-128-3p
MIR497HG	ENSG00000125740	FOSB	1	1	5	277	55.4	0.0180505	hsa-miR-128-3p
MIR497HG	ENSG00000125656	CLPP	1	1	3	277	92.3333	0.0108303	hsa-miR-128-3p
LINC00894	ENSG00000125740	FOSB	1	1	5	277	55.4	0.0180505	hsa-miR-342-3p
AC015813.1	ENSG00000154832	CXXC1	1	1	1	277	277	0.00361011	hsa-miR-590-3p
AC015813.1	ENSG00000155189	AGPAT5	1	1	11	277	25.1818	0.0397112	hsa-miR-590-3p
AC015813.1	ENSG00000169330	KIAA1024	1	1	4	277	69.25	0.0144404	hsa-miR-590-3p
AC015813.1	ENSG00000108788	MLX	1	1	6	277	46.1667	0.0216606	hsa-miR-590-3p
AC015813.1	ENSG00000135723	FHOD1	1	1	2	277	138.5	0.00722022	hsa-miR-590-3p
AC015813.1	ENSG00000167977	KCTD5	1	1	10	277	27.7	0.0361011	hsa-miR-590-3p
AC015813.1	ENSG00000103342	GSPT1	1	1	13	277	21.3077	0.0469314	hsa-miR-590-3p
AC015813.1	ENSG00000179912	R3HDM2	1	1	9	277	30.7778	0.032491	hsa-miR-590-3p
AC015813.1	ENSG00000100307	CBX7	1	1	9	277	30.7778	0.032491	hsa-miR-590-3p
AP000424.1	ENSG00000239305	RNF103	2	2	10	277	27.7	0.00117721	hsa-miR-21-5p,hsa-miR-590-5p
AP000424.1	ENSG00000123124	WWP1	2	2	23	277	12.0435	0.00661853	hsa-miR-21-5p,hsa-miR-590-5p
AP000424.1	ENSG00000106799	TGFBR1	2	2	55	277	5.03636	0.0388479	hsa-miR-21-5p,hsa-miR-590-5p
AP000424.1	ENSG00000144642	RBMS3	2	2	15	277	18.4667	0.00274682	hsa-miR-21-5p,hsa-miR-590-5p
AP000424.1	ENSG00000143878	RHOB	2	2	13	277	21.3077	0.0020405	hsa-miR-21-5p,hsa-miR-590-5p
AP000424.1	ENSG00000173391	OLR1	2	2	15	277	18.4667	0.00274682	hsa-miR-21-5p,hsa-miR-590-5p
AP000424.1	ENSG00000186951	PPARA	2	2	48	277	5.77083	0.0295087	hsa-miR-21-5p,hsa-miR-590-5p
MIR17HG	ENSG00000104643	MTMR9	5	7	28	277	7.06633	0.00013606	hsa-miR-130a-3p,hsa-miR-454-3p,hsa-miR-301a-3p,hsa-miR-301b-3p,hsa-miR-130b-3p
LINC00667	ENSG00000124882	EREG	6	11	31	277	4.8739	0.00037882	hsa-miR-181b-5p,hsa-miR-181a-5p,hsa-miR-19a-3p,hsa-miR-19b-3p,hsa-miR-181c-5p,hsa-miR-181d-5p
LINC00667	ENSG00000196526	AFAP1	4	11	10	277	10.0727	0.000254782	hsa-miR-181b-5p,hsa-miR-181a-5p,hsa-miR-181c-5p,hsa-miR-181d-5p
LINC00667	ENSG00000079332	SAR1A	5	11	26	277	4.84266	0.00155419	hsa-miR-34a-5p,hsa-miR-34c-5p,hsa-miR-19a-3p,hsa-miR-449a,hsa-miR-449b-5p
LINC00667	ENSG00000010539	ZNF200	4	11	20	277	5.03636	0.00475498	hsa-miR-181b-5p,hsa-miR-181a-5p,hsa-miR-181c-5p,hsa-miR-181d-5p
LINC00667	ENSG00000114988	LMAN2L	4	11	12	277	8.39394	0.000575829	hsa-miR-34a-5p,hsa-miR-34c-5p,hsa-miR-449a,hsa-miR-449b-5p
LINC00667	ENSG00000008282	SYPL1	5	11	30	277	4.19697	0.00311189	hsa-miR-181b-5p,hsa-miR-181a-5p,hsa-miR-19b-3p,hsa-miR-181c-5p,hsa-miR-181d-5p
LINC00667	ENSG00000111348	ARHGDIB	1	11	1	277	25.1818	0.0397112	hsa-miR-449a
LINC00667	ENSG00000121005	CRISPLD1	4	11	14	277	7.19481	0.00111631	hsa-miR-181b-5p,hsa-miR-181a-5p,hsa-miR-181c-5p,hsa-miR-181d-5p
LINC00667	ENSG00000135655	USP15	5	11	42	277	2.99784	0.0145905	hsa-miR-181b-5p,hsa-miR-181a-5p,hsa-miR-181c-5p,hsa-miR-181d-5p,hsa-miR-4262
LINC00667	ENSG00000106799	TGFBR1	5	11	55	277	2.28926	0.0455247	hsa-miR-181b-5p,hsa-miR-181a-5p,hsa-miR-181c-5p,hsa-miR-181d-5p,hsa-miR-4262
LINC00667	ENSG00000127314	RAP1B	6	11	59	277	2.56086	0.0140356	hsa-miR-181b-5p,hsa-miR-181a-5p,hsa-miR-19a-3p,hsa-miR-19b-3p,hsa-miR-181c-5p,hsa-miR-181d-5p
LINC00667	ENSG00000122966	CIT	6	11	31	277	4.8739	0.00037882	hsa-miR-181b-5p,hsa-miR-181a-5p,hsa-miR-19a-3p,hsa-miR-19b-3p,hsa-miR-181c-5p,hsa-miR-181d-5p
LINC00667	ENSG00000074695	LMAN1	4	11	19	277	5.30144	0.00388631	hsa-miR-34a-5p,hsa-miR-34c-5p,hsa-miR-449a,hsa-miR-449b-5p
LINC00667	ENSG00000105855	ITGB8	7	11	82	277	2.14967	0.0179819	hsa-miR-181b-5p,hsa-miR-181a-5p,hsa-miR-19a-3p,hsa-miR-19b-3p,hsa-miR-181c-5p,hsa-miR-181d-5p,hsa-miR-4262
LINC00667	ENSG00000168395	ING5	4	11	14	277	7.19481	0.00111631	hsa-miR-181b-5p,hsa-miR-181a-5p,hsa-miR-181c-5p,hsa-miR-181d-5p
LINC00667	ENSG00000165406	MARCH8	4	11	30	277	3.35758	0.0216577	hsa-miR-34a-5p,hsa-miR-34c-5p,hsa-miR-449a,hsa-miR-449b-5p
LINC00667	ENSG00000159023	EPB41	4	11	26	277	3.87413	0.0128911	hsa-miR-181b-5p,hsa-miR-181a-5p,hsa-miR-181c-5p,hsa-miR-181d-5p
LINC00662	ENSG00000135655	USP15	6	9	42	277	4.39683	0.000515991	hsa-miR-16-5p,hsa-miR-15a-5p,hsa-miR-195-5p,hsa-miR-497-5p,hsa-miR-15b-5p,hsa-miR-424-5p
LINC00662	ENSG00000198742	SMURF1	6	9	36	277	5.12963	0.000204139	hsa-miR-16-5p,hsa-miR-15a-5p,hsa-miR-195-5p,hsa-miR-497-5p,hsa-miR-15b-5p,hsa-miR-424-5p
LINC00662	ENSG00000134762	DSC3	2	9	2	277	30.7778	0.000941767	hsa-miR-107,hsa-miR-103a-3p
LINC00662	ENSG00000164542	KIAA0895	3	9	9	277	10.2593	0.00182239	hsa-miR-497-5p,hsa-miR-15b-5p,hsa-miR-424-5p
LINC00662	ENSG00000040199	PHLPP2	6	9	50	277	3.69333	0.00143338	hsa-miR-16-5p,hsa-miR-15a-5p,hsa-miR-195-5p,hsa-miR-497-5p,hsa-miR-15b-5p,hsa-miR-424-5p
LINC00662	ENSG00000123700	KCNJ2	6	9	39	277	4.73504	0.000331317	hsa-miR-16-5p,hsa-miR-15a-5p,hsa-miR-195-5p,hsa-miR-497-5p,hsa-miR-15b-5p,hsa-miR-424-5p
LINC00662	ENSG00000168411	RFWD3	2	9	4	277	15.3889	0.0054604	hsa-miR-107,hsa-miR-103a-3p
LINC00662	ENSG00000186446	ZNF501	1	9	1	277	30.7778	0.032491	hsa-miR-24-3p
SNHG3	ENSG00000066135	KDM4A	1	1	11	277	25.1818	0.0397112	hsa-miR-340-5p
