# Supplementary material for: The Role of Long Noncoding RNAs on Male Infertility: A Systematic Review and In Silico Analysis
Source: Biology (Basel). 2022 Oct 15;11(10):1510. doi: 10.3390/biology11101510 (PMC9598197; doi:10.3390/biology11101510)
Supplement: Supplementary file 1 [file biology-11-01510-s001.zip › Supplementary Table S9.xlsx]

## Sheet: geneInfo
lncRNA	Gene	Ensembl Gene ID	Entrez	Gene Type	Species	Chr	Position (Mbp)	Description
COX10-AS1	MIR1915HG	ENSG00000204682	399726	lncRNA	Human	10	21492658	MIR1915 host gene [Source:HGNC Symbol
COX10-AS1	MIR663AHG	ENSG00000227195	284801	lncRNA	Human	20	26167817	MIR663A host gene [Source:HGNC Symbol
HOTAIR	MIR34A	ENSG00000284357	407040	miRNA	Human	1	9151668	microRNA 34a [Source:HGNC Symbol
HOTAIR	MIR214	ENSG00000283844	406996	miRNA	Human	1	172138798	microRNA 214 [Source:HGNC Symbol
HOTAIR	MIR217	ENSG00000207548	406999	miRNA	Human	2	55982967	microRNA 217 [Source:HGNC Symbol
HOTAIR	MIR149	ENSG00000207611	406941	miRNA	Human	2	240456001	microRNA 149 [Source:HGNC Symbol
HOTAIR	MIR15B	ENSG00000207779	406949	miRNA	Human	3	160404588	microRNA 15b [Source:HGNC Symbol
HOTAIR	MIR218-1	ENSG00000207732	407000	miRNA	Human	4	20528275	microRNA 218-1 [Source:HGNC Symbol
HOTAIR	MIR874	ENSG00000216009	100126343	miRNA	Human	5	137647572	microRNA 874 [Source:HGNC Symbol
HOTAIR	MIR143	ENSG00000284182	406935	miRNA	Human	5	149428918	microRNA 143 [Source:HGNC Symbol
RUSC1-AS1	MIR340	ENSG00000198995	442908	miRNA	Human	5	180015303	microRNA 340 [Source:HGNC Symbol
HOTAIR	MIR206	ENSG00000207604	406989	miRNA	Human	6	52144349	microRNA 206 [Source:HGNC Symbol
HOTAIR	MIR148A	ENSG00000199085	406940	miRNA	Human	7	25949919	microRNA 148a [Source:HGNC Symbol
HOTAIR	MIR23B	ENSG00000207563	407011	miRNA	Human	9	95085208	microRNA 23b [Source:HGNC Symbol
HOTAIR	MIR126	ENSG00000199161	406913	miRNA	Human	9	136670602	microRNA 126 [Source:HGNC Symbol
HOTAIR	MIR326	ENSG00000199090	442900	miRNA	Human	11	75335092	microRNA 326 [Source:HGNC Symbol
HOTAIR	MIR613	ENSG00000207983	693198	miRNA	Human	12	12764649	microRNA 613 [Source:HGNC Symbol
HOTAIR	MIR148B	ENSG00000199122	442892	miRNA	Human	12	54337216	microRNA 148b [Source:HGNC Symbol
HOTAIR	MIR331	ENSG00000199172	442903	miRNA	Human	12	9530842	microRNA 331 [Source:HGNC Symbol
HOTAIR	MIR17	ENSG00000284536	406952	miRNA	Human	13	91350605	microRNA 17 [Source:HGNC Symbol
HOTAIR	MIR20A	ENSG00000283762	406982	miRNA	Human	13	91351065	microRNA 20a [Source:HGNC Symbol
HOTAIR	MIR328	ENSG00000207948	442901	miRNA	Human	16	67202321	microRNA 328 [Source:HGNC Symbol
HOTAIR	MIR454	ENSG00000211514	768216	miRNA	Human	17	59137758	microRNA 454 [Source:HGNC Symbol
HOTAIR	MIR373	ENSG00000199143	442918	miRNA	Human	19	53788705	microRNA 373 [Source:HGNC Symbol
HOTAIR	MIR1-1	ENSG00000199017	406904	miRNA	Human	20	62554306	microRNA 1-1 [Source:HGNC Symbol
HOTAIR	RN7SKP9	ENSG00000201793	NA	misc_RNA	Human	13	99205708	RN7SK pseudogene 9 [Source:HGNC Symbol
HOTAIR	RN7SKP80	ENSG00000202058	NA	misc_RNA	Human	22	42565048	RN7SK pseudogene 80 [Source:HGNC Symbol
HOTAIR	RUNX3	ENSG00000020633	864	protein_coding	Human	1	24899511	RUNX family transcription factor 3 [Source:HGNC Symbol
HOTAIR	LIN28A	ENSG00000131914	79727	protein_coding	Human	1	26410817	lin-28 homolog A [Source:HGNC Symbol
COX10-AS1	ARHGAP29	ENSG00000137962	9411	protein_coding	Human	1	94148988	Rho GTPase activating protein 29 [Source:HGNC Symbol
COX10-AS1	CACYBP	ENSG00000116161	27101	protein_coding	Human	1	174999163	calcyclin binding protein [Source:HGNC Symbol
HOTAIR	LAMC2	ENSG00000058085	3918	protein_coding	Human	1	183186238	laminin subunit gamma 2 [Source:HGNC Symbol
HOTAIR	LAMB3	ENSG00000196878	3914	protein_coding	Human	1	20961487	laminin subunit beta 3 [Source:HGNC Symbol
HOTAIR	PUM2	ENSG00000055917	23369	protein_coding	Human	2	20248691	pumilio RNA binding family member 2 [Source:HGNC Symbol
HOTAIR	SETD2	ENSG00000181555	29072	protein_coding	Human	3	47016429	SET domain containing 2, histone lysine methyltransferase [Source:HGNC Symbol
LINC01359	LRIG1	ENSG00000144749	26018	protein_coding	Human	3	66378797	leucine rich repeats and immunoglobulin like domains 1 [Source:HGNC Symbol
HOTAIR	IGF2BP2	ENSG00000073792	10644	protein_coding	Human	3	18564313	insulin like growth factor 2 mRNA binding protein 2 [Source:HGNC Symbol
COX10-AS1	NOA1	ENSG00000084092	84273	protein_coding	Human	4	5696335	nitric oxide associated 1 [Source:HGNC Symbol
COX10-AS1	PTPN13	ENSG00000163629	5783	protein_coding	Human	4	86594315	protein tyrosine phosphatase non-receptor type 13 [Source:HGNC Symbol
HOTAIR	CASP3	ENSG00000164305	836	protein_coding	Human	4	184627696	caspase 3 [Source:HGNC Symbol
HOTAIR	CDKN1A	ENSG00000124762	1026	protein_coding	Human	6	3667646	cyclin dependent kinase inhibitor 1A [Source:HGNC Symbol
HOTAIR	VEGFA	ENSG00000112715	7422	protein_coding	Human	6	43770184	vascular endothelial growth factor A [Source:HGNC Symbol
HOTAIR	LIN28B	ENSG00000187772	389421	protein_coding	Human	6	104936616	lin-28 homolog B [Source:HGNC Symbol
HOTAIR	QKI	ENSG00000112531	9444	protein_coding	Human	6	163414	QKI, KH domain containing RNA binding [Source:HGNC Symbol
HOTAIR	TWIST1	ENSG00000122691	7291	protein_coding	Human	7	19020991	twist family bHLH transcription factor 1 [Source:HGNC Symbol
HOTAIR	IGF2BP3	ENSG00000136231	10643	protein_coding	Human	7	23310209	insulin like growth factor 2 mRNA binding protein 3 [Source:HGNC Symbol
HOTAIR	HOXA5	ENSG00000106004	3202	protein_coding	Human	7	27141052	homeobox A5 [Source:HGNC Symbol
HOTAIR	CAV1	ENSG00000105974	857	protein_coding	Human	7	116524994	caveolin 1 [Source:HGNC Symbol
HOTAIR	EZH2	ENSG00000106462	2146	protein_coding	Human	7	148807257	enhancer of zeste 2 polycomb repressive complex 2 subunit [Source:HGNC Symbol
COX10-AS1	DNAJB6	ENSG00000105993	10049	protein_coding	Human	7	157335381	DnaJ heat shock protein family (Hsp40) member B6 [Source:HGNC Symbol
HOTAIR	ANGPT2	ENSG00000091879	285	protein_coding	Human	8	6499632	angiopoietin 2 [Source:HGNC Symbol
HOTAIR	TNFRSF10B	ENSG00000120889	8795	protein_coding	Human	8	23020133	TNF receptor superfamily member 10b [Source:HGNC Symbol
COX10-AS1	PHF20L1	ENSG00000129292	51105	protein_coding	Human	8	132775358	PHD finger protein 20 like 1 [Source:HGNC Symbol
HOTAIR	ZEB1	ENSG00000148516	6935	protein_coding	Human	10	31318495	zinc finger E-box binding homeobox 1 [Source:HGNC Symbol
HOTAIR	MAPK8	ENSG00000107643	5599	protein_coding	Human	10	48306639	mitogen-activated protein kinase 8 [Source:HGNC Symbol
HOTAIR	SIRT1	ENSG00000096717	23411	protein_coding	Human	10	67884656	sirtuin 1 [Source:HGNC Symbol
HOTAIR	CD82	ENSG00000085117	3732	protein_coding	Human	11	44564427	CD82 molecule [Source:HGNC Symbol
COX10-AS1	FADS1	ENSG00000149485	3992	protein_coding	Human	11	61799627	fatty acid desaturase 1 [Source:HGNC Symbol
HOTAIR	MMP1	ENSG00000196611	4312	protein_coding	Human	11	102789401	matrix metallopeptidase 1 [Source:HGNC Symbol
HOTAIR	MMP3	ENSG00000149968	4314	protein_coding	Human	11	102835801	matrix metallopeptidase 3 [Source:HGNC Symbol
HOTAIR	WIF1	ENSG00000156076	11197	protein_coding	Human	12	65050626	WNT inhibitory factor 1 [Source:HGNC Symbol
HOTAIR	RB1	ENSG00000139687	5925	protein_coding	Human	13	48303744	RB transcriptional corepressor 1 [Source:HGNC Symbol
HOTAIR	HNRNPC	ENSG00000092199	3183	protein_coding	Human	14	21209136	heterogeneous nuclear ribonucleoprotein C [Source:HGNC Symbol
HOTAIR	ARID4A	ENSG00000032219	5926	protein_coding	Human	14	58298504	AT-rich interaction domain 4A [Source:HGNC Symbol
HOTAIR	HIF1A	ENSG00000100644	3091	protein_coding	Human	14	61695513	hypoxia inducible factor 1 subunit alpha [Source:HGNC Symbol
HOTAIR	AKT1	ENSG00000142208	207	protein_coding	Human	14	104769349	AKT serine/threonine kinase 1 [Source:HGNC Symbol
COX10-AS1	NFATC2IP	ENSG00000176953	84901	protein_coding	Human	16	28950807	nuclear factor of activated T cells 2 interacting protein [Source:HGNC Symbol
HOTAIR	FUS	ENSG00000089280	2521	protein_coding	Human	16	31180138	FUS RNA binding protein [Source:HGNC Symbol
HOTAIR	CDH1	ENSG00000039068	999	protein_coding	Human	16	68737292	cadherin 1 [Source:HGNC Symbol
COX10-AS1	TRPV3	ENSG00000167723	162514	protein_coding	Human	17	3510502	transient receptor potential cation channel subfamily V member 3 [Source:HGNC Symbol
HOTAIR	TP53	ENSG00000141510	7157	protein_coding	Human	17	7661779	tumor protein p53 [Source:HGNC Symbol
HOTAIR	ERBB2	ENSG00000141736	2064	protein_coding	Human	17	39687914	erb-b2 receptor tyrosine kinase 2 [Source:HGNC Symbol
HOTAIR	IGF2BP1	ENSG00000159217	10642	protein_coding	Human	17	48997385	insulin like growth factor 2 mRNA binding protein 1 [Source:HGNC Symbol
COX10-AS1	BCAS3	ENSG00000141376	54828	protein_coding	Human	17	60677453	BCAS3 microtubule associated cell migration factor [Source:HGNC Symbol
HOTAIR	EIF4A3	ENSG00000141543	9775	protein_coding	Human	17	80134369	eukaryotic translation initiation factor 4A3 [Source:HGNC Symbol
HOTAIR	FASN	ENSG00000169710	2194	protein_coding	Human	17	82078338	fatty acid synthase [Source:HGNC Symbol
HOTAIR	BCL2	ENSG00000171791	596	protein_coding	Human	18	63123346	BCL2 apoptosis regulator [Source:HGNC Symbol
HOTAIR	ELAVL1	ENSG00000066044	1994	protein_coding	Human	19	7958573	ELAV like RNA binding protein 1 [Source:HGNC Symbol
HOTAIR	DNMT1	ENSG00000130816	1786	protein_coding	Human	19	10133342	DNA methyltransferase 1 [Source:HGNC Symbol
HOTAIR	UPF1	ENSG00000005007	5976	protein_coding	Human	19	18831959	UPF1 RNA helicase and ATPase [Source:HGNC Symbol
HOTAIR	CCNE1	ENSG00000105173	898	protein_coding	Human	19	29811991	cyclin E1 [Source:HGNC Symbol
COX10-AS1	SNRNP70	ENSG00000104852	6625	protein_coding	Human	19	49085419	small nuclear ribonucleoprotein U1 subunit 70 [Source:HGNC Symbol
HOTAIR	U2AF2	ENSG00000063244	11338	protein_coding	Human	19	55654146	U2 small nuclear RNA auxiliary factor 2 [Source:HGNC Symbol
HOTAIR	MMP9	ENSG00000100985	4318	protein_coding	Human	20	46008908	matrix metallopeptidase 9 [Source:HGNC Symbol
HOTAIR	SNAI1	ENSG00000124216	6615	protein_coding	Human	20	4998298	snail family transcriptional repressor 1 [Source:HGNC Symbol
HOTAIR	RBM38	ENSG00000132819	55544	protein_coding	Human	20	57391396	RNA binding motif protein 38 [Source:HGNC Symbol
HOTAIR	ADAMTS5	ENSG00000154736	11096	protein_coding	Human	21	26917922	ADAM metallopeptidase with thrombospondin type 1 motif 5 [Source:HGNC Symbol
COX10-AS1	PDXK	ENSG00000160209	8566	protein_coding	Human	21	43719094	pyridoxal kinase [Source:HGNC Symbol
HOTAIR	RTCB	ENSG00000100220	51493	protein_coding	Human	22	32387582	RNA 2',3'-cyclic phosphate and 5'-OH ligase [Source:HGNC Symbol
HOTAIR	ZC3H7B	ENSG00000100403	23264	protein_coding	Human	22	41301525	zinc finger CCCH-type containing 7B [Source:HGNC Symbol
HOTAIR	CACNA1C	ENSG00000285479	775	protein_coding	Human	CHR_HG1815_PATCH	1970786	calcium voltage-gated channel subunit alpha1 C [Source:HGNC Symbol
HOTAIR	ABCC1	ENSG00000278183	4363	protein_coding	Human	CHR_HSCHR16_1_CTG1	1603469	ATP binding cassette subfamily C member 1 [Source:HGNC Symbol
HOTAIR	TJP1	ENSG00000277401	7082	protein_coding	Human	CHR_HSCHR15_4_CTG8	29850002	tight junction protein 1 [Source:HGNC Symbol
COX10-AS1	HNRNPL	ENSG00000282947	3191	protein_coding	Human	CHR_HG26_PATCH	38836424	heterogeneous nuclear ribonucleoprotein L [Source:HGNC Symbol
COX10-AS1	LENG8	ENSG00000276458	114823	protein_coding	Human	CHR_HSCHR19LRC_COX1_CTG3_1	54380864	leukocyte receptor cluster member 8 [Source:HGNC Symbol
HOTAIR	AR	ENSG00000169083	367	protein_coding	Human	X	67544021	androgen receptor [Source:HGNC Symbol
HOTAIR	PTEN	ENSG00000284792	5728	protein_coding	Human	CHR_HG2334_PATCH	8786344	phosphatase and tensin homolog [Source:HGNC Symbol
HOTAIR	FMR1	ENSG00000102081	2332	protein_coding	Human	X	147911919	FMRP translational regulator 1 [Source:HGNC Symbol
COX10-AS1	RNA28S5	Not mapped	NA	rRNA	Human	NA	NA	NA
